# Supplementary material
Source: PubMed Central journal article supplement (PMC3442569)
Supplement: supp_tpc.112.095752_tpc095753Supplemental.pdf [file supp_tpc.112.095752_tpc095753Supplemental.pdf]

**A**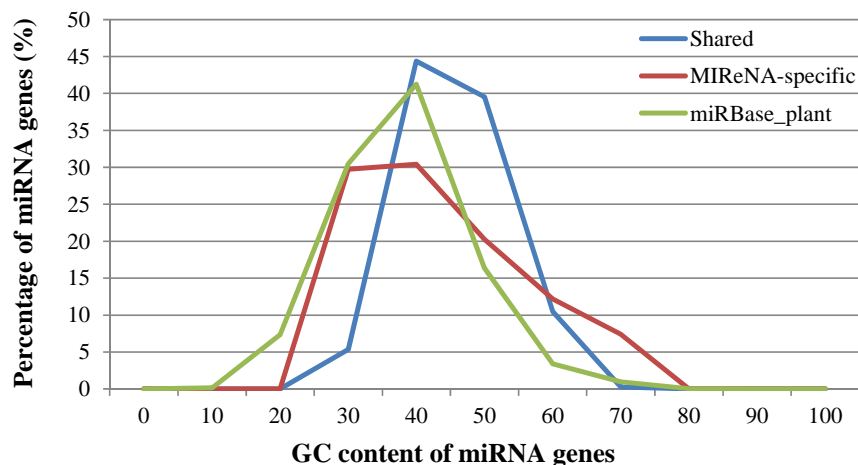**B**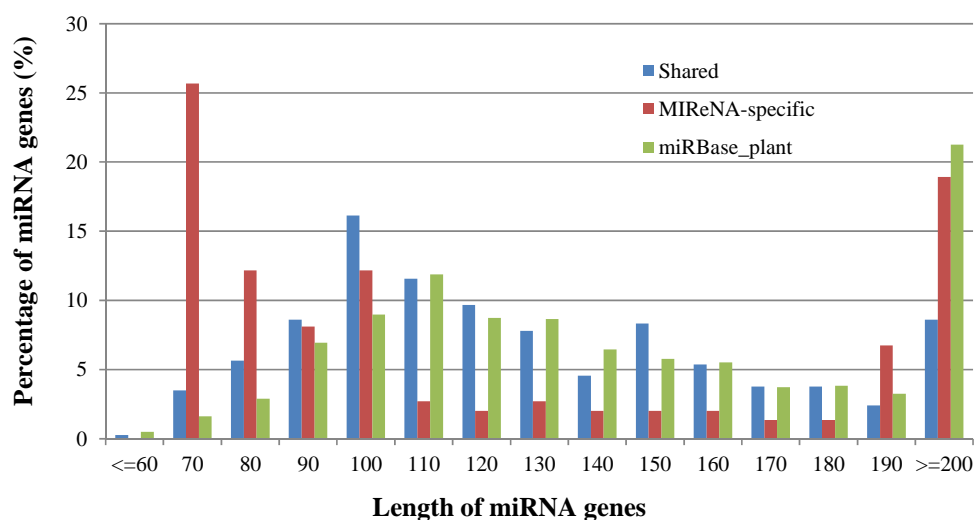**C**

| Species             | Chromosome_region | MIRENA-specific | Shared | Fisher's Exact Test      |
|---------------------|-------------------|-----------------|--------|--------------------------|
| <i>Brachypodium</i> | Sub-telomeric     | 23              | 55     | $p\text{-value} = 0,011$ |
|                     | Peri-centromeric  | 18              | 16     |                          |
| Rice                | Sub-telomeric     | 22              | 86     | $p\text{-value} = 0,015$ |
|                     | Peri-centromeric  | 16              | 24     |                          |
| Sorghum             | Sub-telomeric     | 34              | 74     | $p\text{-value} = 0$     |
|                     | Peri-centromeric  | 65              | 19     |                          |
| Maize               | Sub-telomeric     | 33              | 91     | $p\text{-value} = 0,023$ |
|                     | Peri-centromeric  | 23              | 30     |                          |
| <b>Total</b>        | Sub-telomeric     | 112             | 306    | $p\text{-value} = 0$     |
|                     | Peri-centromeric  | 122             | 89     |                          |

**Supplemental Figure 1: Comparison between miRBase and MIRENA datasets.**

**A-** GC content among shared, MIRENA-specific miRNA genes in four grass species, and total plant miRNA genes in miRBase database. **B-** Length distribution among shared, MIRENA-specific miRNA genes in four grass species, and total plant miRNA genes in miRBase database. **C-** The different distribution in the different chromosome region between shared and MIRENA-specific miRNA genes.

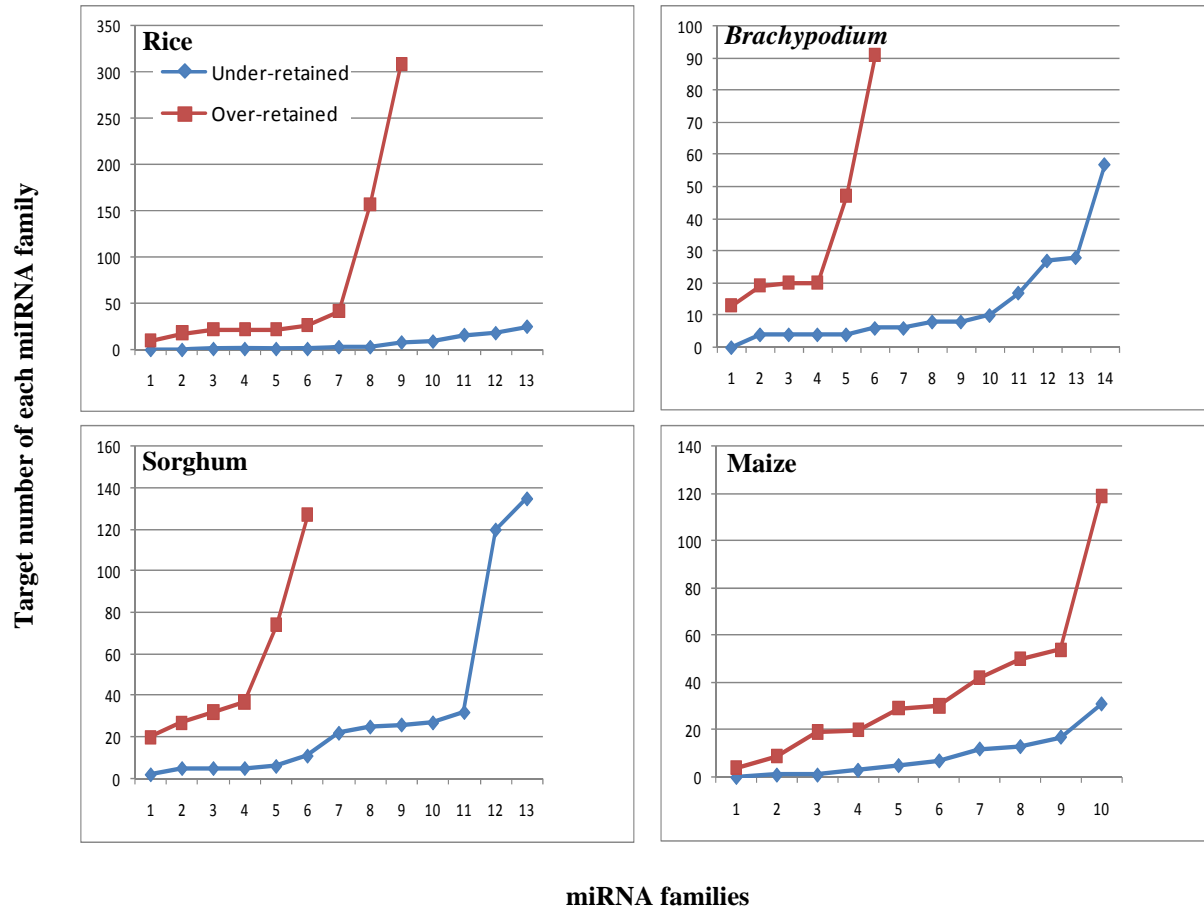

**Supplemental Figure 2: Positive correlation between over-retained miRNA families and the number of target genes in monocots.**

The figures illustrate the number of target genes (y-axis) as a function of the number of miRNA families (x-axis) for the under- (blue curve) and over- (red curve) retained miRNAs observed in rice, *Brachypodium*, sorghum, and maize genomes.

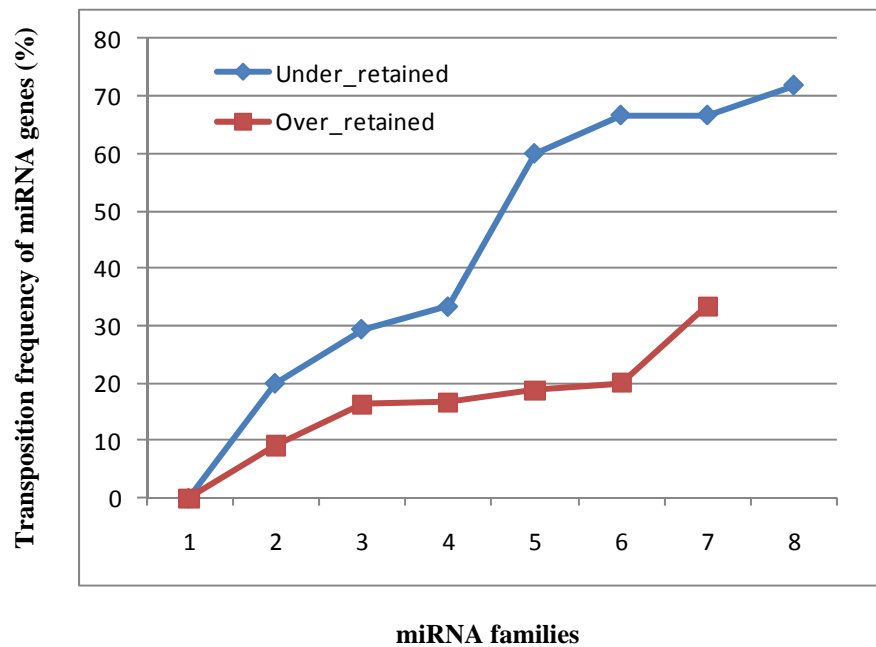

**Supplemental Figure 3: Transposition frequency of grass miRNA families.**

The figure illustrates the transposition frequency of miRNAs (y-axis) as a function of the number of miRNA families (x-axis) for the under- (blue curve) and over- (red curve) retained miRNAs observed in rice, *Brachypodium*, sorghum, and maize genomes.

**Supplemental Table 1. Conserved and duplicated miRNA genes identified in monocots.**

The table provides the number of miRNAs from the 22 considered families (first column) in rice, sorghum, maize and *Brachypodium*. For each species are mentioned the number of detected miRNAs ('MIRENA' column), the number and percentage of orthologs ('Ortholog' column), and the number of paralogs ('Paralogs' column).

|            | Rice   |           |          | Sorghum |           |          | Maize  |           |          | Brachypodium |           |          |
|------------|--------|-----------|----------|---------|-----------|----------|--------|-----------|----------|--------------|-----------|----------|
|            | MIRENA | orthologs | paralogs | MIRENA  | orthologs | paralogs | MIRENA | orthologs | paralogs | MIRENA       | orthologs | paralogs |
| miR156/157 | 22     | 10 (45%)  | 5        | 32      | 10 (31%)  | 4        | 25     | 8 (32%)   | 3        | 13           | 10 (77%)  | 2        |
| miR159     | 6      | 2 (33%)   | 0        | 2       | 1 (50%)   | 0        | 12     | 1 (8%)    | 1        | 7            | 2 (29%)   | 1        |
| miR160     | 13     | 3 (23%)   | 1        | 5       | 2 (40%)   | 0        | 5      | 0 (0%)    | 0        | 4            | 2 (50%)   | 0        |
| miR164     | 5      | 4 (80%)   | 1        | 6       | 2 (33%)   | 0        | 5      | 4 (80%)   | 1        | 4            | 2 (50%)   | 0        |
| miR166     | 8      | 5 (63%)   | 2        | 5       | 4 (80%)   | 0        | 9      | 5 (56%)   | 0        | 6            | 5 (83%)   | 0        |
| miR167     | 10     | 10 (100%) | 2        | 12      | 10 (83%)  | 2        | 12     | 9 (75%)   | 2        | 7            | 6 (86%)   | 1        |
| miR168     | 1      | 0 (0%)    | 0        | 2       | 0 (0%)    | 0        | 0      | 0 (0%)    | 0        | 0            | 0 (0%)    | 0        |
| miR169     | 14     | 13 (93%)  | 2        | 25      | 15 (60%)  | 4        | 20     | 9 (45%)   | 1        | 12           | 8 (67%)   | 2        |
| miR170/171 | 7      | 6 (86%)   | 0        | 12      | 7 (58%)   | 1        | 8      | 6 (75%)   | 2        | 3            | 2 (67%)   | 0        |
| miR172     | 4      | 4 (100%)  | 0        | 32      | 4 (13%)   | 0        | 10     | 2 (20%)   | 0        | 6            | 2 (33%)   | 0        |
| miR319     | 3      | 1 (33%)   | 0        | 3       | 2 (67%)   | 0        | 2      | 2 (100%)  | 0        | 4            | 0 (0%)    | 0        |
| miR390     | 1      | 1 (100%)  | 0        | 2       | 1 (50%)   | 0        | 2      | 1 (50%)   | 0        | 1            | 1 (100%)  | 0        |
| miR393     | 4      | 4 (100%)  | 0        | 1       | 1 (100%)  | 0        | 6      | 3 (50%)   | 0        | 4            | 4 (100%)  | 0        |
| miR394     | 1      | 1 (100%)  | 0        | 2       | 1 (50%)   | 0        | 2      | 1 (50%)   | 1        | 1            | 0 (0%)    | 0        |
| miR395     | 17     | 13 (76%)  | 0        | 17      | 11 (65%)  | 0        | 18     | 10 (56%)  | 5        | 19           | 8 (42%)   | 0        |
| miR396     | 3      | 3 (100%)  | 1        | 4       | 3 (75%)   | 1        | 7      | 4 (57%)   | 3        | 6            | 4 (67%)   | 1        |
| miR397     | 1      | 0 (0%)    | 0        | 1       | 0 (0%)    | 0        | 2      | 0 (0%)    | 0        | 0            | 0 (0%)    | 0        |
| miR398     | 1      | 1 (100%)  | 0        | 0       | 0 (0%)    | 0        | 3      | 1 (33%)   | 1        | 1            | 0 (0%)    | 0        |
| miR399     | 9      | 9 (100%)  | 2        | 11      | 10 (91%)  | 2        | 18     | 4 (22%)   | 0        | 9            | 5 (56%)   | 1        |
| miR528     | 4      | 1 (25%)   | 0        | 3       | 1 (33%)   | 0        | 5      | 1 (20%)   | 1        | 1            | 0 (0%)    | 0        |
| miR529     | 13     | 2 (15%)   | 1        | 15      | 2 (13%)   | 0        | 5      | 2 (40%)   | 0        | 3            | 2 (67%)   | 0        |
| miR535     | 3      | 0 (0%)    | 0        | 0       | 0 (0%)    | 0        | 1      | 0 (0%)    | 0        | 1            | 0 (0%)    | 0        |
| total      | 150    | 93 (62%)  | 17       | 192     | 87 (45%)  | 14       | 177    | 73 (41%)  | 21       | 112          | 63 (56%)  | 8        |

**Supplemental Table 2. Conserved and duplicated miRNA genes identified in eudicots.**

The table provides the number of miRNAs from the 22 considered families (first column) in grape, Arabidopsis, soybean, poplar and cacao. For each species are mentioned the number of detected miRNAs ('MIRENA' column), the number and percentage of ortholog ('Ortholog' column), and the number of paralogs ('Paralogs' column).

|            | Grape  |           |          | Arabidopsis |           |          | Soybean |           |          | Poplar |           |          | Cacao  |           |          |
|------------|--------|-----------|----------|-------------|-----------|----------|---------|-----------|----------|--------|-----------|----------|--------|-----------|----------|
|            | MIRENA | orthologs | paralogs | MIRENA      | orthologs | paralogs | MIRENA  | orthologs | paralogs | MIRENA | orthologs | paralogs | MIRENA | orthologs | paralogs |
| miR156/157 | 17     | 7 (41%)   | 2        | 20          | 4 (20%)   | 2        | 57      | 5 (8%)    | 12       | 16     | 4 (25%)   | 5        | 13     | 2 (15%)   | 0        |
| miR159     | 5      | 1 (20%)   | 0        | 3           | 0         | 0        | 8       | 1 (13%)   | 1        | 5      | 0         | 0        | 3      | 0         | 0        |
| miR160     | 4      | 1 (25%)   | 0        | 1           | 0         | 0        | 3       | 1 (33%)   | 1        | 3      | 0         | 0        | 0      | 0         | 0        |
| miR164     | 4      | 1 (25%)   | 0        | 3           | 0         | 0        | 12      | 0         | 5        | 8      | 1 (13%)   | 3        | 5      | 0         | 0        |
| miR166     | 5      | 1 (20%)   | 0        | 4           | 1 (25%)   | 1        | 9       | 0         | 1        | 6      | 0         | 2        | 3      | 0         | 0        |
| miR167     | 5      | 3 (60%)   | 1        | 3           | 1 (33%)   | 0        | 9       | 3 (33%)   | 3        | 4      | 2 (50%)   | 1        | 1      | 0         | 0        |
| miR168     | 0      | 0         | 0        | 2           | 0         | 0        | 0       | 0         | 0        | 2      | 0         | 0        | 2      | 0         | 0        |
| miR169     | 26     | 2 (7%)    | 0        | 10          | 1 (10%)   | 1        | 28      | 0         | 8        | 22     | 0         | 3        | 13     | 2 (15%)   | 1        |
| miR170/171 | 7      | 2 (28%)   | 0        | 3           | 0         | 1        | 14      | 1 (7%)    | 3        | 8      | 2 (25%)   | 2        | 5      | 3 (60%)   | 1        |
| miR172     | 6      | 2 (33%)   | 2        | 7           | 2 (29%)   | 1        | 19      | 2 (10%)   | 5        | 7      | 0         | 1        | 6      | 2 (33%)   | 1        |
| miR319     | 2      | 0         | 0        | 2           | 0         | 0        | 11      | 0         | 2        | 5      | 0         | 0        | 1      | 0         | 0        |
| miR390     | 2      | 1 (50%)   | 0        | 2           | 1 (50%)   | 0        | 7       | 1 (14%)   | 3        | 4      | 0         | 2        | 1      | 0         | 0        |
| miR393     | 4      | 0         | 0        | 2           | 0         | 1        | 19      | 0         | 4        | 7      | 0         | 1        | 2      | 0         | 0        |
| miR394     | 3      | 0         | 0        | 2           | 0         | 1        | 4       | 0         | 1        | 2      | 0         | 1        | 2      | 0         | 0        |
| miR395     | 15     | 0         | 1        | 5           | 0         | 2        | 14      | 0         | 2        | 7      | 0         | 2        | 4      | 0         | 0        |
| miR396     | 6      | 2 (33%)   | 1        | 2           | 0         | 0        | 10      | 0         | 4        | 8      | 2 (25%)   | 1        | 5      | 1 (20%)   | 0        |
| miR397     | 0      | 0         | 0        | 1           | 0         | 0        | 3       | 0         | 1        | 2      | 0         | 0        | 0      | 0         | 0        |
| miR398     | 3      | 1 (33%)   | 0        | 3           | 1 (33%)   | 0        | 3       | 0         | 1        | 2      | 0         | 0        | 2      | 0         | 0        |
| miR399     | 7      | 4 (57%)   | 0        | 6           | 0         | 1        | 18      | 0         | 7        | 6      | 4 (33%)   | 1        | 8      | 0         | 1        |
| miR528     | 13     | 0         | 1        | 0           | 0         | 0        | 0       | 0         | 0        | 0      | 0         | 0        | 0      | 0         | 0        |
| miR529     | 13     | 0         | 0        | 9           | 0         | 2        | 25      | 0         | 3        | 8      | 0         | 0        | 7      | 0         | 0        |
| miR535     | 0      | 0         | 0        | 0           | 0         | 0        | 1       | 0         | 0        | 0      | 0         | 0        | 1      | 0         | 0        |
| total      | 147    | 28 (19%)  | 8        | 90          | 11 (12%)  | 13       | 274     | 14 (5%)   | 67       | 132    | 15 (11%)  | 25       | 84     | 10 (12%)  | 4        |

**Supplemental Table 3. Over-retention frequency of miRNA families in rice, *Brachypodium*, sorghum and maize.**

Note: Osa: rice; Bdi: *Brachypodium*; Sbi: sorghum; Zma: maize; ORM\_fam: Over-retained miRNA families; TM\_fam: total miRNA families with at least members; ORMF\_FR: frequency of over-retained miRNA families.

| Species | #ORM_fam | #TM_fam | ORMF_FR(%) |
|---------|----------|---------|------------|
| Osa     | 9        | 17      | 52.94      |
| Bdi     | 6        | 15      | 40.00      |
| Sbi     | 6        | 18      | 33.33      |
| Zma     | 11       | 20      | 55.00      |
| Average | 8        | 17.5    | 45.32      |

**Supplemental Table 4. Over-retained miRNA families in rice, *Brachypodium*, sorghum and maize.**

The table delivers the miRNA families with members retained (between rice [Osa], *Brachypodium* [Bdi], sorghum [Sbi], and maize [Zma]) at the intra-specific syntenic regions after WGD, i.e., defined as over-retained miRNAs.

| Osa    | Bdi    | Sbi    | Zma    |
|--------|--------|--------|--------|
| miR156 | miR156 | miR156 | miR156 |
| --     | miR159 | --     | miR159 |
| miR160 | --     | --     | --     |
| miR164 | --     | --     | miR164 |
| miR166 | --     | --     | --     |
| miR167 | miR167 | miR167 | miR167 |
| miR169 | miR169 | miR169 | miR169 |
| --     | --     | miR171 | miR171 |
| --     | --     | --     | miR394 |
| --     | --     | --     | miR395 |
| miR396 | miR396 | miR396 | miR396 |
| miR399 | miR399 | miR399 | --     |
| miR529 | --     | --     | --     |
| --     | --     | --     | miR398 |
| --     | --     | --     | miR528 |

**Supplemental Table 5. Under-retained miRNA families in rice, *Brachypodium*, sorghum and maize.**

The table delivers the miRNA family with no members conserved ((between rice [Osa], *Brachypodium* [Bdi], sorghum [Sbi], and maize [Zma]) at the intra-specific syntenic regions after WGD, i.e., defined as under-retained miRNAs.

| Osa    | Bdi    | Sbi    | Zma    |
|--------|--------|--------|--------|
| miR159 | --     | miR159 | --     |
| --     | miR160 | miR160 | miR160 |
| --     | miR164 | miR164 | miR166 |
| --     | miR166 | miR166 | miR166 |
| miR168 | --     | miR168 | --     |
| miR171 | miR171 | --     | --     |
| miR172 | miR172 | miR172 | miR172 |
| miR319 | miR319 | miR319 | miR319 |
| miR390 | miR390 | miR390 | miR390 |
| miR393 | miR393 | miR393 | miR393 |
| miR394 | miR394 | miR394 | --     |
| miR395 | miR395 | miR395 | --     |
| miR397 |        | miR397 | miR397 |
| miR398 | miR398 | --     | --     |
| --     | --     | --     | miR399 |
| miR528 | miR528 | miR528 |        |
| --     | miR529 | miR529 | miR529 |
| miR535 | miR535 | --     | miR535 |



**Supplemental Table 6. Number of miRNA targets in rice, *Brachypodium*, sorghum and maize.**  
MiRNA families in the gray shadow regions are over-retained after WGD.

| OSA    |         | SBI    |         | BDI    |         | ZMA    |         |
|--------|---------|--------|---------|--------|---------|--------|---------|
| Family | #Target | Family | #Target | Family | #Target | Family | #Target |
| miR390 | 0       | miR390 | 2       | miR398 | 0       | miR390 | 0       |
| miR398 | 0       | miR319 | 5       | miR171 | 4       | miR397 | 1       |
| miR168 | 1       | miR394 | 5       | miR390 | 4       | miR398 | 1       |
| miR319 | 1       | miR397 | 5       | miR393 | 4       | miR319 | 3       |
| miR394 | 1       | miR159 | 6       | miR535 | 4       | miR393 | 5       |
| miR528 | 1       | miR168 | 11      | miR319 | 6       | miR160 | 7       |
| miR393 | 3       | miR528 | 22      | miR394 | 6       | miR166 | 12      |
| miR535 | 3       | miR160 | 25      | miR166 | 8       | miR399 | 13      |
| miR171 | 8       | miR166 | 26      | miR528 | 8       | miR529 | 17      |
| miR397 | 9       | miR395 | 27      | miR160 | 10      | miR172 | 31      |
| miR172 | 16      | miR164 | 32      | miR395 | 17      | miR394 | 4       |
| miR159 | 18      | miR529 | 120     | miR172 | 27      | miR171 | 9       |
| miR395 | 25      | miR172 | 135     | miR529 | 28      | miR167 | 19      |
| miR160 | 10      | miR399 | 20      | miR164 | 57      | miR159 | 20      |
| miR167 | 18      | miR171 | 27      | miR159 | 13      | miR395 | 29      |
| miR166 | 22      | miR396 | 32      | miR396 | 19      | miR528 | 30      |
| miR169 | 22      | miR167 | 37      | miR167 | 20      | miR164 | 42      |
| miR396 | 22      | miR169 | 74      | miR169 | 20      | miR169 | 50      |
| miR399 | 27      | miR156 | 127     | miR399 | 47      | miR396 | 54      |
| miR164 | 42      |        |         | miR156 | 91      | miR156 | 119     |
| miR156 | 157     |        |         |        |         |        |         |
| miR529 | 309     |        |         |        |         |        |         |

**Supplemental Table 7. MiRNA target gene enrichment analysis in GO biological process categories.**

Over-Retained miRNA (OR-miRNA) and Under-retained miRNAs (UR-miRNA) (as defined in the legends of Table S3 and S4) with the list of their target genes in statistically enriched GO terms are listed. Adjusted *p-value*, based on Benjamini and Hochberg correction applied on hypergeometric test, is given. Cluster frequency represents total number of genes annotated to that GO term divided by total number of genes in the test set. Total frequency represents total number of genes annotated to that GO term divided by the total number of genes in the reference set. Since one gene can be related to multiple GO terms, the sum of the percentages in each column is not a relevant parameter.

| species                     | GO    | Description                     | P-value  | FDR      | cluster freq    | total freq          | genes                                                                                                                                                                       | miRNA                                                                                                                                                                                   |                                                                           |
|-----------------------------|-------|---------------------------------|----------|----------|-----------------|---------------------|-----------------------------------------------------------------------------------------------------------------------------------------------------------------------------|-----------------------------------------------------------------------------------------------------------------------------------------------------------------------------------------|---------------------------------------------------------------------------|
| <b>RESPONSE TO STIMULUS</b> |       |                                 |          |          |                 |                     |                                                                                                                                                                             |                                                                                                                                                                                         |                                                                           |
| Bdi_OR                      | 9719  | response to endogenous stimulus | 1.01E-04 | 8.05E-03 | 4/92<br>4.3%    | 24/8800 0.2%        | BRADI3G04920 BRADI5G25770 BRADI4G01730<br>BRADI1G32550                                                                                                                      | miR167                                                                                                                                                                                  |                                                                           |
|                             | 9725  | response to hormone stimulus    | 1.01E-04 | 8.05E-03 | 4/92<br>4.3%    | 24/8800 0.2%        | BRADI3G04920 BRADI5G25770 BRADI4G01730<br>BRADI1G32550                                                                                                                      | miR167                                                                                                                                                                                  |                                                                           |
|                             | 10033 | response to organic substance   | 1.20E-04 | 8.05E-03 | 4/92<br>4.3%    | 25/8800 0.2%        | BRADI3G04920 BRADI5G25770 BRADI4G01730<br>BRADI1G32550                                                                                                                      | miR167                                                                                                                                                                                  |                                                                           |
| Osa_OR                      | 10033 | response to organic substance   | 3.17E-10 | 3.13E-08 | 8/511<br>1.5%   | 26/45432 0.0%       | LOC_OS06G46410<br>LOC_OS10G33940<br>LOC_OS02G41800<br>LOC_OS12G41950                                                                                                        | LOC_OS02G06910<br>LOC_OS04G59430<br>LOC_OS04G57610<br>LOC_OS06G47150                                                                                                                    | miR160 miR167                                                             |
|                             | 9719  | response to endogenous stimulus | 3.17E-10 | 3.13E-08 | 8/511<br>1.5%   | 26/45432 0.0%       | LOC_OS06G46410<br>LOC_OS10G33940<br>LOC_OS02G41800<br>LOC_OS12G41950                                                                                                        | LOC_OS02G06910<br>LOC_OS04G59430<br>LOC_OS04G57610<br>LOC_OS06G47150                                                                                                                    | miR160 miR167                                                             |
|                             | 9725  | response to hormone stimulus    | 3.17E-10 | 3.13E-08 | 8/511<br>1.5%   | 26/45432 0.0%       | LOC_OS06G46410<br>LOC_OS10G33940<br>LOC_OS02G41800<br>LOC_OS12G41950                                                                                                        | LOC_OS02G06910<br>LOC_OS04G59430<br>LOC_OS04G57610<br>LOC_OS06G47150                                                                                                                    | miR160 miR167                                                             |
| Zm_OR                       | 9719  | response to endogenous stimulus | 1.06E-07 | 6.28E-06 | 7/174<br>4.0%   | 38/16863 0.2%       | GRMZM2G028980<br>GRMZM2G475882<br>GRMZM2G035405<br>GRMZM2G073750                                                                                                            | GRMZM2G089640<br>GRMZM2G078274<br>GRMZM2G378580                                                                                                                                         | miR159 miR167                                                             |
|                             | 50896 | response to stimulus            | 7.33E-04 | 7.86E-03 | 35/174<br>20.1% | 1950/16863<br>11.5% | AC210013.4<br>GRMZM2G154987<br>GRMZM2G060721<br>GRMZM2G009892<br>AC212570.3<br>GRMZM2G089640<br>GRMZM2G377589<br>AY530952.1<br>GRMZM2G178261<br>AC189750.4<br>GRMZM2G104262 | GRMZM2G111082<br>GRMZM2G450128<br>GRMZM2G114850<br>GRMZM2G378580<br>GRMZM2G073750<br>GRMZM2G146380<br>GRMZM2G035405<br>GRMZM2G023840<br>GRMZM2G028980<br>GRMZM2G103812<br>GRMZM2G078274 | miR156<br>miR159<br>miR164<br>miR167<br>miR169<br>miR395<br>miR396 miR528 |

|        |       |                                 |          |          |              |               |                                                                                                               |                                                                                                    |                                              |                                              |                                              |                  |        |
|--------|-------|---------------------------------|----------|----------|--------------|---------------|---------------------------------------------------------------------------------------------------------------|----------------------------------------------------------------------------------------------------|----------------------------------------------|----------------------------------------------|----------------------------------------------|------------------|--------|
| Bdi_UR | 9719  | response to endogenous stimulus | 2.30E-06 | 2.07E-04 | 5/82<br>6.0% | 24/8800 0.2%  | GRMZM2G107562<br>GRMZM2G040785<br>AC204352.3<br>GRMZM2G047456<br>GRMZM2G164909<br>AC233899.1<br>GRMZM2G166940 | GRMZM2G018484<br>GRMZM2G059887<br>GRMZM2G152808<br>GRMZM2G475882<br>GRMZM2G405581<br>GRMZM2G136525 | BRADI3G28950<br>BRADI5G27400<br>BRADI1G33160 | BRADI3G49320<br>BRADI3G49320<br>BRADI3G49320 | BRADI5G15900<br>BRADI5G15900<br>BRADI5G15900 | miR160           |        |
|        | 9725  | response to hormone stimulus    | 2.30E-06 | 2.07E-04 | 5/82<br>6.0% | 24/8800 0.2%  |                                                                                                               |                                                                                                    | BRADI3G28950<br>BRADI5G27400<br>BRADI1G33160 | BRADI3G49320<br>BRADI3G49320<br>BRADI3G49320 | BRADI5G15900<br>BRADI5G15900<br>BRADI5G15900 | miR160           |        |
|        | 42221 | response to chemical stimulus   | 2.04E-03 | 2.23E-02 | 8/82<br>9.7% | 247/8800 2.8% |                                                                                                               |                                                                                                    | BRADI3G28950<br>BRADI5G18830<br>BRADI1G33160 | BRADI3G49320<br>BRADI5G27400<br>BRADI3G51590 | BRADI5G15900<br>BRADI5G27210<br>BRADI5G27210 | miR160<br>miR166 | miR164 |

**BIOLOGY REGULATION**

|        |       |                                            |          |          |                |                   |                                                                                                                                                                                                                                                                                                                                              |                                                                                                                                                                                                                                                                                                                              |                                                                                                                                                                                                                                                                                                                              |                                      |                            |
|--------|-------|--------------------------------------------|----------|----------|----------------|-------------------|----------------------------------------------------------------------------------------------------------------------------------------------------------------------------------------------------------------------------------------------------------------------------------------------------------------------------------------------|------------------------------------------------------------------------------------------------------------------------------------------------------------------------------------------------------------------------------------------------------------------------------------------------------------------------------|------------------------------------------------------------------------------------------------------------------------------------------------------------------------------------------------------------------------------------------------------------------------------------------------------------------------------|--------------------------------------|----------------------------|
| Bdi_UR | 45449 | regulation of transcription                | 1.36E-05 | 3.58E-04 | 23/82<br>28.0% | 960/8800<br>10.9% | BRADI5G15900<br>BRADI1G17660<br>BRADI2G53260<br>BRADI2G37800<br>BRADI5G00700<br>BRADI3G47630<br>BRADI2G57100<br>BRADI3G52840<br>BRADI3G28950<br>BRADI3G49320<br>BRADI3G46900<br>BRADI1G47670<br>BRADI3G28970<br>BRADI4G02060<br>BRADI5G27400<br>BRADI1G13910<br>BRADI1G32660<br>BRADI1G53650<br>BRADI2G06210<br>BRADI4G01890<br>BRADI1G33160 | BRADI5G15900<br>BRADI2G29960<br>BRADI1G03880<br>BRADI2G37800<br>BRADI5G00700<br>BRADI3G52840<br>BRADI3G28950<br>BRADI3G49320<br>BRADI1G47670<br>BRADI3G28970<br>BRADI5G27400<br>BRADI1G13910<br>BRADI1G53650<br>BRADI4G01890<br>BRADI2G06210<br>BRADI1G33160                                                                 | BRADI5G15900<br>BRADI1G03880<br>BRADI2G29960<br>BRADI1G17660<br>BRADI2G53260<br>BRADI2G37800<br>BRADI5G00700<br>BRADI3G47630<br>BRADI2G57100<br>BRADI3G52840<br>BRADI3G28950<br>BRADI3G49320<br>BRADI1G47670<br>BRADI3G28970<br>BRADI5G27400<br>BRADI1G13910<br>BRADI1G53650<br>BRADI4G01890<br>BRADI2G06210<br>BRADI1G33160 | miR160<br>miR166<br>miR393<br>miR529 | miR164<br>miR172<br>miR398 |
|        | 6355  | regulation of DNA-transcription, dependent | 8.90E-05 | 1.21E-03 | 16/82<br>19.5% | 590/8800 6.7%     | BRADI5G15900<br>BRADI1G17660<br>BRADI2G53260<br>BRADI2G37800<br>BRADI5G00700<br>BRADI3G47630<br>BRADI2G57100<br>BRADI3G52840<br>BRADI3G28950<br>BRADI3G49320<br>BRADI1G47670<br>BRADI3G28970<br>BRADI5G27400<br>BRADI1G13910<br>BRADI1G53650<br>BRADI4G01890<br>BRADI2G06210<br>BRADI1G33160                                                 | BRADI5G15900<br>BRADI1G03880<br>BRADI2G29960<br>BRADI1G17660<br>BRADI2G53260<br>BRADI2G37800<br>BRADI5G00700<br>BRADI3G47630<br>BRADI2G57100<br>BRADI3G52840<br>BRADI3G28950<br>BRADI3G49320<br>BRADI1G47670<br>BRADI3G28970<br>BRADI5G27400<br>BRADI1G13910<br>BRADI1G53650<br>BRADI4G01890<br>BRADI2G06210<br>BRADI1G33160 | BRADI5G15900<br>BRADI1G03880<br>BRADI2G29960<br>BRADI1G17660<br>BRADI2G53260<br>BRADI2G37800<br>BRADI5G00700<br>BRADI3G47630<br>BRADI2G57100<br>BRADI3G52840<br>BRADI3G28950<br>BRADI3G49320<br>BRADI1G47670<br>BRADI3G28970<br>BRADI5G27400<br>BRADI1G13910<br>BRADI1G53650<br>BRADI4G01890<br>BRADI2G06210<br>BRADI1G33160 | miR160<br>miR172<br>miR529           | miR166<br>miR398           |
|        | 10468 | regulation of gene expression              | 1.85E-05 | 3.66E-04 | 23/82<br>28.0% | 978/8800<br>11.1% | BRADI5G15900<br>BRADI1G17660<br>BRADI2G53260<br>BRADI2G37800<br>BRADI5G00700<br>BRADI3G47630<br>BRADI2G57100<br>BRADI3G52840<br>BRADI3G28950<br>BRADI3G49320<br>BRADI1G47670<br>BRADI3G28970<br>BRADI4G02060<br>BRADI5G27400<br>BRADI1G13910<br>BRADI1G32660<br>BRADI1G53650<br>BRADI2G06210<br>BRADI4G01890<br>BRADI1G33160                 | BRADI5G15900<br>BRADI1G03880<br>BRADI2G29960<br>BRADI1G17660<br>BRADI2G53260<br>BRADI2G37800<br>BRADI5G00700<br>BRADI3G47630<br>BRADI2G57100<br>BRADI3G52840<br>BRADI3G28950<br>BRADI3G49320<br>BRADI1G47670<br>BRADI3G28970<br>BRADI5G27400<br>BRADI1G13910<br>BRADI1G53650<br>BRADI4G01890<br>BRADI2G06210<br>BRADI1G33160 | BRADI5G15900<br>BRADI1G03880<br>BRADI2G29960<br>BRADI1G17660<br>BRADI2G53260<br>BRADI2G37800<br>BRADI5G00700<br>BRADI3G47630<br>BRADI2G57100<br>BRADI3G52840<br>BRADI3G28950<br>BRADI3G49320<br>BRADI1G47670<br>BRADI3G28970<br>BRADI5G27400<br>BRADI1G13910<br>BRADI1G53650<br>BRADI4G01890<br>BRADI2G06210<br>BRADI1G33160 | miR160<br>miR166<br>miR393<br>miR529 | miR164<br>miR172<br>miR398 |
|        | 9889  | regulation of biosynthetic process         | 1.64E-05 | 3.58E-04 | 23/82<br>28.0% | 971/8800<br>11.0% | BRADI5G15900<br>BRADI1G17660<br>BRADI2G53260<br>BRADI2G37800<br>BRADI5G00700<br>BRADI3G47630<br>BRADI2G57100<br>BRADI3G52840<br>BRADI3G28950<br>BRADI3G49320<br>BRADI1G47670<br>BRADI3G28970<br>BRADI4G02060<br>BRADI5G27400<br>BRADI1G13910<br>BRADI1G32660<br>BRADI1G53650<br>BRADI2G06210<br>BRADI4G01890<br>BRADI1G33160                 | BRADI5G15900<br>BRADI1G03880<br>BRADI2G29960<br>BRADI1G17660<br>BRADI2G53260<br>BRADI2G37800<br>BRADI5G00700<br>BRADI3G47630<br>BRADI2G57100<br>BRADI3G52840<br>BRADI3G28950<br>BRADI3G49320<br>BRADI1G47670<br>BRADI3G28970<br>BRADI5G27400<br>BRADI1G13910<br>BRADI1G53650<br>BRADI4G01890<br>BRADI2G06210<br>BRADI1G33160 | BRADI5G15900<br>BRADI1G03880<br>BRADI2G29960<br>BRADI1G17660<br>BRADI2G53260<br>BRADI2G37800<br>BRADI5G00700<br>BRADI3G47630<br>BRADI2G57100<br>BRADI3G52840<br>BRADI3G28950<br>BRADI3G49320<br>BRADI1G47670<br>BRADI3G28970<br>BRADI5G27400<br>BRADI1G13910<br>BRADI1G53650<br>BRADI4G01890<br>BRADI2G06210<br>BRADI1G33160 | miR160<br>miR166<br>miR393<br>miR529 | miR164<br>miR172<br>miR398 |

|       |                                                   |          |          |                |                    |                                                                                                                                                                                                                                                                                                                                                                                                                                                                            |                                                |                            |
|-------|---------------------------------------------------|----------|----------|----------------|--------------------|----------------------------------------------------------------------------------------------------------------------------------------------------------------------------------------------------------------------------------------------------------------------------------------------------------------------------------------------------------------------------------------------------------------------------------------------------------------------------|------------------------------------------------|----------------------------|
| 31326 | regulation of cellular biosynthetic process       | 1.64E-05 | 3.58E-04 | 23/82<br>28.0% | 971/8800<br>11.0%  | BRADI5G15900 BRADI1G03880 BRADI2G29960<br>BRADI1G17660 BRADI2G53260 BRADI2G37800<br>BRADI5G00700 BRADI3G47630 BRADI2G57100<br>BRADI3G52840 BRADI3G28950 BRADI3G49320<br>BRADI3G46900 BRADI1G47670 BRADI3G28970<br>BRADI4G02060 BRADI5G27400 BRADI1G13910<br>BRADI1G32660 BRADI1G53650 BRADI2G06210<br>BRADI4G01890 BRADI1G33160                                                                                                                                            | miR160<br>miR166<br>miR393<br>miR529           | miR164<br>miR172<br>miR398 |
| 10556 | regulation of macromolecule biosynthetic process  | 1.64E-05 | 3.58E-04 | 23/82<br>28.0% | 971/8800<br>11.0%  | BRADI5G15900 BRADI1G03880 BRADI2G29960<br>BRADI1G17660 BRADI2G53260 BRADI2G37800<br>BRADI5G00700 BRADI3G47630 BRADI2G57100<br>BRADI3G52840 BRADI3G28950 BRADI3G49320<br>BRADI3G46900 BRADI1G47670 BRADI3G28970<br>BRADI4G02060 BRADI5G27400 BRADI1G13910<br>BRADI1G32660 BRADI1G53650 BRADI2G06210<br>BRADI4G01890 BRADI1G33160                                                                                                                                            | miR160<br>miR166<br>miR393<br>miR529           | miR164<br>miR172<br>miR398 |
| 50794 | regulation of cellular process                    | 2.07E-04 | 2.66E-03 | 24/82<br>29.2% | 1219/8800<br>13.8% | BRADI5G15900 BRADI2G54230 BRADI1G03880<br>BRADI2G29960 BRADI1G17660 BRADI2G53260<br>BRADI2G37800 BRADI5G00700 BRADI3G47630<br>BRADI2G57100 BRADI3G52840 BRADI3G28950<br>BRADI3G49320 BRADI3G46900 BRADI1G47670<br>BRADI3G28970 BRADI4G02060 BRADI5G27400<br>BRADI1G13910 BRADI1G32660 BRADI1G53650<br>BRADI2G06210 BRADI4G01890 BRADI1G33160<br>BRADI5G15900 BRADI2G54230 BRADI1G03880<br>BRADI2G29960 BRADI1G17660 BRADI2G53260<br>BRADI2G37800 BRADI5G00700 BRADI3G47630 | miR160<br>miR166<br>miR393<br>miR528<br>miR529 | miR164<br>miR172<br>miR398 |
| 50789 | regulation of biological process                  | 5.69E-04 | 6.90E-03 | 24/82<br>29.2% | 1303/8800<br>14.8% | BRADI2G57100 BRADI3G52840 BRADI3G28950<br>BRADI3G49320 BRADI3G46900 BRADI1G47670<br>BRADI3G28970 BRADI4G02060 BRADI5G27400<br>BRADI1G13910 BRADI1G32660 BRADI1G53650<br>BRADI2G06210 BRADI4G01890 BRADI1G33160<br>BRADI5G15900 BRADI2G54230 BRADI1G03880<br>BRADI2G29960 BRADI1G17660 BRADI2G53260<br>BRADI2G37800 BRADI5G00700 BRADI3G47630                                                                                                                               | miR160<br>miR166<br>miR393<br>miR528<br>miR529 | miR164<br>miR172<br>miR398 |
| 65007 | biological regulation                             | 1.42E-03 | 1.63E-02 | 24/82<br>29.2% | 1388/8800<br>15.7% | BRADI2G57100 BRADI3G52840 BRADI3G28950<br>BRADI3G49320 BRADI3G46900 BRADI1G47670<br>BRADI3G28970 BRADI4G02060 BRADI5G27400<br>BRADI1G13910 BRADI1G32660 BRADI1G53650<br>BRADI2G06210 BRADI4G01890 BRADI1G33160<br>BRADI5G15900 BRADI2G54230 BRADI1G03880<br>BRADI2G29960 BRADI1G17660 BRADI2G53260<br>BRADI2G37800 BRADI5G00700 BRADI3G47630                                                                                                                               | miR160<br>miR166<br>miR393<br>miR528<br>miR529 | miR164<br>miR172<br>miR398 |
| 51171 | regulation of nitrogen compound metabolic process | 8.75E-06 | 3.58E-04 | 24/82<br>29.2% | 1005/8800<br>11.4% | BRADI2G57100 BRADI3G52840 BRADI3G28950<br>BRADI3G49320 BRADI3G46900 BRADI1G47670<br>BRADI3G28970 BRADI4G02060 BRADI5G27400<br>BRADI1G13910 BRADI1G32660 BRADI1G53650<br>BRADI2G06210 BRADI4G01890 BRADI1G33160                                                                                                                                                                                                                                                             | miR160<br>miR166<br>miR393<br>miR528<br>miR529 | miR164<br>miR172<br>miR398 |





|        |                                                                                     |          |          |                 |                     |  |  |  |                                     |                                      |                            |
|--------|-------------------------------------------------------------------------------------|----------|----------|-----------------|---------------------|--|--|--|-------------------------------------|--------------------------------------|----------------------------|
|        |                                                                                     |          |          |                 |                     |  |  |  | LOC_OS04G46384 LOC_OS05G41166       |                                      |                            |
|        |                                                                                     |          |          |                 |                     |  |  |  | LOC_OS11G06020 LOC_OS06G43220       |                                      |                            |
|        |                                                                                     |          |          |                 |                     |  |  |  | LOC_OS03G52239 LOC_OS03G60430       |                                      |                            |
| 50789  | regulation of biological process                                                    | 7.99E-03 | 4.73E-02 | 10/95<br>10.5%  | 1963/45432<br>4.3%  |  |  |  | LOC_OS02G15760 LOC_OS07G13170       | miR159<br>miR395                     | miR172                     |
|        |                                                                                     |          |          |                 |                     |  |  |  | LOC_OS01G12700 LOC_OS05G03040       |                                      |                            |
|        |                                                                                     |          |          |                 |                     |  |  |  | LOC_OS04G46384 LOC_OS05G41166       |                                      |                            |
| 51252  | regulation of RNA metabolic process                                                 | 5.86E-03 | 3.62E-02 | 6/95<br>6.3%    | 776/45432<br>1.7%   |  |  |  | LOC_OS11G06020 LOC_OS06G43220       | miR172                               | miR395                     |
|        |                                                                                     |          |          |                 |                     |  |  |  | LOC_OS03G52239 LOC_OS03G60430       |                                      |                            |
|        |                                                                                     |          |          |                 |                     |  |  |  | LOC_OS07G13170 LOC_OS05G03040       |                                      |                            |
|        |                                                                                     |          |          |                 |                     |  |  |  | LOC_OS11G06020 LOC_OS06G43220       |                                      |                            |
| 45449  | regulation of transcription                                                         | 1.16E-03 | 1.84E-02 | 10/95<br>10.5%  | 1495/45432<br>3.2%  |  |  |  | LOC_OS03G52239 LOC_OS03G60430       | miR159<br>miR395                     | miR172                     |
|        |                                                                                     |          |          |                 |                     |  |  |  | LOC_OS02G15760 LOC_OS07G13170       |                                      |                            |
|        |                                                                                     |          |          |                 |                     |  |  |  | LOC_OS01G12700 LOC_OS05G03040       |                                      |                            |
|        |                                                                                     |          |          |                 |                     |  |  |  | LOC_OS04G46384 LOC_OS05G41166       |                                      |                            |
|        |                                                                                     |          |          |                 |                     |  |  |  | LOC_OS11G06020 LOC_OS06G43220       |                                      |                            |
| 10468  | regulation of gene expression                                                       | 1.58E-03 | 1.84E-02 | 10/95<br>10.5%  | 1559/45432<br>3.4%  |  |  |  | LOC_OS03G52239 LOC_OS03G60430       | miR159<br>miR395                     | miR172                     |
|        |                                                                                     |          |          |                 |                     |  |  |  | LOC_OS02G15760 LOC_OS07G13170       |                                      |                            |
|        |                                                                                     |          |          |                 |                     |  |  |  | LOC_OS01G12700 LOC_OS05G03040       |                                      |                            |
|        |                                                                                     |          |          |                 |                     |  |  |  | LOC_OS04G46384 LOC_OS05G41166       |                                      |                            |
| 6355   | regulation of transcription, DNA-dependent                                          | 5.75E-03 | 3.62E-02 | 6/95<br>6.3%    | 773/45432<br>1.7%   |  |  |  | LOC_OS11G06020 LOC_OS06G43220       | miR172                               | miR395                     |
|        |                                                                                     |          |          |                 |                     |  |  |  | LOC_OS03G52239 LOC_OS03G60430       |                                      |                            |
|        |                                                                                     |          |          |                 |                     |  |  |  | LOC_OS07G13170 LOC_OS05G03040       |                                      |                            |
|        |                                                                                     |          |          |                 |                     |  |  |  | LOC_OS11G06020 LOC_OS06G43220       |                                      |                            |
| 19219  | regulation of nucleobase, nucleoside, nucleotide and nucleic acid metabolic process | 1.46E-03 | 1.84E-02 | 10/95<br>10.5%  | 1543/45432<br>3.3%  |  |  |  | LOC_OS03G52239 LOC_OS03G60430       | miR159<br>miR395                     | miR172                     |
|        |                                                                                     |          |          |                 |                     |  |  |  | LOC_OS02G15760 LOC_OS07G13170       |                                      |                            |
|        |                                                                                     |          |          |                 |                     |  |  |  | LOC_OS01G12700 LOC_OS05G03040       |                                      |                            |
|        |                                                                                     |          |          |                 |                     |  |  |  | LOC_OS04G46384 LOC_OS05G41166       |                                      |                            |
|        |                                                                                     |          |          |                 |                     |  |  |  | SB04G026610 SB10G025390 SB03G000840 |                                      |                            |
|        |                                                                                     |          |          |                 |                     |  |  |  | SB08G021460 SB01G006380 SB01G003400 |                                      |                            |
|        |                                                                                     |          |          |                 |                     |  |  |  | SB08G021350 SB06G024630 SB01G021280 |                                      |                            |
|        |                                                                                     |          |          |                 |                     |  |  |  | SB01G010930 SB03G029330 SB08G016670 |                                      |                            |
|        |                                                                                     |          |          |                 |                     |  |  |  | SB10G027913 SB10G027790 SB06G024360 |                                      |                            |
|        |                                                                                     |          |          |                 |                     |  |  |  | SB03G000530 SB03G002660 SB10G006690 |                                      |                            |
|        |                                                                                     |          |          |                 |                     |  |  |  | SB10G004590 SB08G006330 SB06G019010 |                                      |                            |
|        |                                                                                     |          |          |                 |                     |  |  |  | SB04G009390 SB03G037560 SB10G020490 | miR160<br>miR166                     | miR164<br>miR172           |
| Sbi_UR | regulation of macromolecule biosynthetic process,                                   | 1.15E-06 | 7.65E-05 | 56/212<br>26.4% | 2689/19262<br>13.9% |  |  |  | SB07G027160 SB02G020900 SB03G000560 | miR319<br>miR394<br>miR397<br>miR529 | miR390<br>miR395<br>miR528 |
| 10556  |                                                                                     |          |          |                 |                     |  |  |  | SB10G010430 SB01G029650 SB02G007000 |                                      |                            |
|        |                                                                                     |          |          |                 |                     |  |  |  | SB09G020160 SB01G019130 SB08G006300 |                                      |                            |
|        |                                                                                     |          |          |                 |                     |  |  |  | SB07G000645 SB10G024180 SB06G024510 |                                      |                            |
|        |                                                                                     |          |          |                 |                     |  |  |  | SB10G025053 SB01G037670 SB10G027220 |                                      |                            |
|        |                                                                                     |          |          |                 |                     |  |  |  | SB10G022530 SB04G022260 SB07G019850 |                                      |                            |
|        |                                                                                     |          |          |                 |                     |  |  |  | SB06G033970 SB06G022810 SB04G023990 |                                      |                            |
|        |                                                                                     |          |          |                 |                     |  |  |  | SB04G032570 SB04G032590 SB02G030600 |                                      |                            |
|        |                                                                                     |          |          |                 |                     |  |  |  | SB06G025190 SB02G000900 SB01G013710 |                                      |                            |
|        |                                                                                     |          |          |                 |                     |  |  |  | SB01G019120 SB01G050000 SB10G000520 |                                      |                            |
|        |                                                                                     |          |          |                 |                     |  |  |  | SB09G029840 SB06G024820             |                                      |                            |

|             |                                                    |             |          |                 |                     |             |                              |             |             |             |
|-------------|----------------------------------------------------|-------------|----------|-----------------|---------------------|-------------|------------------------------|-------------|-------------|-------------|
| 51171       | regulation of nitrogen compound metabolic process, | 1.63E-06    | 9.27E-05 | 57/212<br>26.8% | 2789/19262<br>14.4% | SB04G026610 | SB10G025390                  | SB03G000840 | miR160      | miR164      |
|             |                                                    |             |          |                 |                     | SB08G021460 | SB01G006380                  | SB01G003400 |             |             |
|             |                                                    |             |          |                 |                     | SB08G021350 | SB06G024630                  | SB01G021280 |             |             |
|             |                                                    |             |          |                 |                     | SB01G010930 | SB03G029330                  | SB08G016670 |             |             |
|             |                                                    |             |          |                 |                     | SB10G027913 | SB10G027790                  | SB06G024360 |             |             |
|             |                                                    |             |          |                 |                     | SB03G000530 | SB03G002660                  | SB10G006690 |             |             |
|             |                                                    |             |          |                 |                     | SB10G004590 | SB08G006330                  | SB06G019010 |             |             |
|             |                                                    |             |          |                 |                     | SB04G009390 | SB03G037560                  | SB10G020490 |             |             |
|             |                                                    |             |          |                 |                     | SB07G027160 | SB02G020900                  | SB03G000560 |             |             |
|             |                                                    |             |          |                 |                     | SB10G010430 | SB01G029650                  | SB02G007000 |             |             |
|             |                                                    |             |          |                 |                     | SB02G039740 | SB09G020160                  | SB01G019130 |             |             |
|             |                                                    |             |          |                 |                     | SB08G006300 | SB07G000645                  | SB10G024180 |             |             |
|             |                                                    |             |          |                 |                     | SB06G024510 | SB10G025053                  | SB01G037670 |             |             |
|             |                                                    |             |          |                 |                     | SB10G027220 | SB04G022260                  | SB10G022530 |             |             |
|             |                                                    |             |          |                 |                     | SB07G019850 | SB06G033970                  | SB06G022810 |             |             |
|             |                                                    |             |          |                 |                     | SB04G023990 | SB04G032570                  | SB04G032590 |             |             |
|             |                                                    |             |          |                 |                     | SB02G030600 | SB06G025190                  | SB02G000900 |             |             |
|             |                                                    |             |          |                 |                     | SB01G013710 | SB01G019120                  | SB01G050000 |             |             |
|             |                                                    |             |          |                 |                     | SB10G000520 | SB09G029840                  | SB06G024820 |             |             |
|             |                                                    |             |          |                 |                     | 45449       | regulation of transcription, | 2.30E-07    |             |             |
| SB08G021460 | SB01G006380                                        | SB01G003400 |          |                 |                     |             |                              |             |             |             |
| SB08G021350 | SB06G024630                                        | SB01G021280 |          |                 |                     |             |                              |             |             |             |
| SB01G010930 | SB03G029330                                        | SB08G016670 |          |                 |                     |             |                              |             |             |             |
| SB10G027913 | SB10G027790                                        | SB06G024360 |          |                 |                     |             |                              |             |             |             |
| SB03G000530 | SB03G002660                                        | SB10G006690 |          |                 |                     |             |                              |             |             |             |
| SB10G004590 | SB08G006330                                        | SB06G019010 |          |                 |                     |             |                              |             |             |             |
| SB04G009390 | SB03G037560                                        | SB10G020490 |          |                 |                     |             |                              |             |             |             |
| SB07G027160 | SB02G020900                                        | SB03G000560 |          |                 |                     |             |                              |             |             |             |
| SB10G010430 | SB01G029650                                        | SB02G007000 |          |                 |                     |             |                              |             |             |             |
| SB09G020160 | SB01G019130                                        | SB08G006300 |          |                 |                     |             |                              |             |             |             |
| SB07G000645 | SB10G024180                                        | SB06G024510 |          |                 |                     |             |                              |             |             |             |
| SB10G025053 | SB01G037670                                        | SB10G027220 |          |                 |                     |             |                              |             |             |             |
| SB10G022530 | SB04G022260                                        | SB07G019850 |          |                 |                     |             |                              |             |             |             |
| SB06G033970 | SB06G022810                                        | SB04G023990 |          |                 |                     |             |                              |             |             |             |
| SB04G032570 | SB04G032590                                        | SB02G030600 |          |                 |                     |             |                              |             |             |             |
| SB06G025190 | SB02G000900                                        | SB01G013710 |          |                 |                     |             |                              |             |             |             |
| SB01G019120 | SB01G050000                                        | SB10G000520 |          |                 |                     |             |                              |             |             |             |
| SB09G029840 | SB06G024820                                        |             |          |                 |                     |             |                              |             |             |             |
| 10468       | regulation of gene expression,                     | 5.44E-07    | 4.40E-05 | 60/212<br>28.3% | 2906/19262<br>15.0% |             |                              |             | SB04G026610 | SB10G025390 |
|             |                                                    |             |          |                 |                     | SB08G021460 | SB01G006380                  | SB01G003400 |             |             |
|             |                                                    |             |          |                 |                     | SB08G021350 | SB06G024630                  | SB01G021280 |             |             |
|             |                                                    |             |          |                 |                     | SB01G010930 | SB03G029330                  | SB08G016670 |             |             |
|             |                                                    |             |          |                 |                     | SB10G027913 | SB10G027790                  | SB06G024360 |             |             |
|             |                                                    |             |          |                 |                     | SB03G000530 | SB03G002660                  | SB10G006690 |             |             |
|             |                                                    |             |          |                 |                     | SB10G004590 | SB08G006330                  | SB06G019010 |             |             |
|             |                                                    |             |          |                 |                     | SB04G009390 | SB03G037560                  | SB10G020490 |             |             |
|             |                                                    |             |          |                 |                     | SB07G027160 | SB06G025560                  | SB02G020900 |             |             |
|             |                                                    |             |          |                 |                     | SB03G000560 | SB10G010430                  | SB01G029650 |             |             |
|             |                                                    |             |          |                 |                     | SB04G038420 | SB02G007000                  | SB02G039740 |             |             |
|             |                                                    |             |          |                 |                     |             |                              |             |             |             |
|             |                                                    |             |          |                 |                     |             |                              |             |             |             |
|             |                                                    |             |          |                 |                     |             |                              |             |             |             |



|        |       |                              |          |          |                 |                     |  |  |               |             |               |        |        |
|--------|-------|------------------------------|----------|----------|-----------------|---------------------|--|--|---------------|-------------|---------------|--------|--------|
|        |       |                              |          |          |                 |                     |  |  | SB09G020160   | SB01G019130 | SB08G006300   |        |        |
|        |       |                              |          |          |                 |                     |  |  | SB07G000645   | SB10G024180 | SB06G024510   |        |        |
|        |       |                              |          |          |                 |                     |  |  | SB01G037670   | SB10G025053 | SB10G027220   |        |        |
|        |       |                              |          |          |                 |                     |  |  | SB04G022260   | SB10G022530 | SB07G019850   |        |        |
|        |       |                              |          |          |                 |                     |  |  | SB06G033970   | SB06G022810 | SB04G023990   |        |        |
|        |       |                              |          |          |                 |                     |  |  | SB04G032570   | SB04G032590 | SB02G030600   |        |        |
|        |       |                              |          |          |                 |                     |  |  | SB06G025190   | SB02G000900 | SB01G013710   |        |        |
|        |       |                              |          |          |                 |                     |  |  | SB01G019120   | SB01G050000 | SB10G000520   |        |        |
|        |       |                              |          |          |                 |                     |  |  | SB09G029840   | SB10G031030 | SB06G024820   |        |        |
|        |       |                              |          |          |                 |                     |  |  | SB04G026610   | SB10G025390 | SB03G000840   |        |        |
|        |       |                              |          |          |                 |                     |  |  | SB08G021460   | SB01G006380 | SB01G003400   |        |        |
|        |       |                              |          |          |                 |                     |  |  | SB08G021350   | SB06G024630 | SB01G021280   |        |        |
|        |       |                              |          |          |                 |                     |  |  | SB01G010930   | SB03G029330 | SB08G016670   |        |        |
|        |       |                              |          |          |                 |                     |  |  | SB10G027913   | SB10G027790 | SB06G024360   |        |        |
|        |       |                              |          |          |                 |                     |  |  | SB03G000530   | SB03G002660 | SB10G006690   |        |        |
|        |       |                              |          |          |                 |                     |  |  | SB10G004590   | SB08G006330 | SB06G019010   |        |        |
|        |       |                              |          |          |                 |                     |  |  | SB04G009390   | SB03G037560 | SB10G020490   | miR160 | miR164 |
|        |       |                              |          |          |                 |                     |  |  | SB07G027160   | SB02G020900 | SB03G000560   | miR166 | miR172 |
|        |       |                              |          |          |                 |                     |  |  | SB10G010430   | SB01G029650 | SB02G007000   | miR319 | miR390 |
|        |       |                              |          |          |                 |                     |  |  | SB02G039740   | SB09G020160 | SB01G019130   | miR394 | miR395 |
|        |       |                              |          |          |                 |                     |  |  | SB08G006300   | SB07G000645 | SB10G024180   | miR397 | miR528 |
|        |       |                              |          |          |                 |                     |  |  | SB06G024510   | SB10G025053 | SB01G037670   | miR529 |        |
|        |       |                              |          |          |                 |                     |  |  | SB10G027220   | SB04G022260 | SB10G022530   |        |        |
|        |       |                              |          |          |                 |                     |  |  | SB07G019850   | SB06G033970 | SB06G022810   |        |        |
|        |       |                              |          |          |                 |                     |  |  | SB04G023990   | SB04G032570 | SB04G032590   |        |        |
|        |       |                              |          |          |                 |                     |  |  | SB02G030600   | SB06G025190 | SB02G000900   |        |        |
|        |       |                              |          |          |                 |                     |  |  | SB01G013710   | SB01G019120 | SB01G050000   |        |        |
|        |       |                              |          |          |                 |                     |  |  | SB10G000520   | SB09G029840 | SB06G024820   |        |        |
|        |       |                              |          |          |                 |                     |  |  | AC207656.3    |             | GRMZM2G178102 |        |        |
|        |       |                              |          |          |                 |                     |  |  | GRMZM2G085751 |             | GRMZM2G409974 |        |        |
|        |       |                              |          |          |                 |                     |  |  | GRMZM2G010357 |             | AC225147.4    |        |        |
|        |       |                              |          |          |                 |                     |  |  | GRMZM2G081406 |             | GRMZM2G369356 | miR160 | miR166 |
|        |       |                              |          |          |                 |                     |  |  | GRMZM2G390641 |             | GRMZM2G005284 | miR172 | miR399 |
|        |       |                              |          |          |                 |                     |  |  | GRMZM2G109987 |             | AC187157.4    | miR529 |        |
|        |       |                              |          |          |                 |                     |  |  | GRMZM2G126239 |             | GRMZM2G017414 |        |        |
|        |       |                              |          |          |                 |                     |  |  | GRMZM2G176175 |             | GRMZM2G076602 |        |        |
|        |       |                              |          |          |                 |                     |  |  | SB01G019050   | SB01G009330 | SB09G002225   |        |        |
|        |       |                              |          |          |                 |                     |  |  | SB02G003070   | SB01G029650 | SB08G021460   |        |        |
|        |       |                              |          |          |                 |                     |  |  | SB04G034800   | SB10G027100 | SB08G021080   |        |        |
|        |       |                              |          |          |                 |                     |  |  | SB07G000645   | SB01G006020 | SB04G004430   |        |        |
|        |       |                              |          |          |                 |                     |  |  | SB05G021480   | SB08G021350 | SB10G025053   | miR160 | miR166 |
|        |       |                              |          |          |                 |                     |  |  | SB06G015640   | SB06G027465 | SB01G040270   | miR172 | miR390 |
|        |       |                              |          |          |                 |                     |  |  | SB04G030770   | SB06G032500 | SB10G027220   | miR395 | miR397 |
|        |       |                              |          |          |                 |                     |  |  | SB06G024630   | SB01G021280 | SB01G050333   | miR528 | miR529 |
|        |       |                              |          |          |                 |                     |  |  | SB08G019930   | SB01G010930 | SB02G002720   |        |        |
|        |       |                              |          |          |                 |                     |  |  | SB01G012170   | SB04G032590 | SB04G032570   |        |        |
|        |       |                              |          |          |                 |                     |  |  | SB06G025710   | SB04G004940 | SB10G029190   |        |        |
| Zm_UR  | 6350  | transcription                | 9.23E-04 | 1.75E-02 | 16/50<br>32.0%  | 2364/16863<br>14.0% |  |  |               |             |               |        |        |
| Sbi_OR | 45449 | regulation of transcription, | 4.59E-05 | 5.42E-03 | 40/160<br>25.0% | 2560/19262<br>13.2% |  |  |               |             |               |        |        |

|       |                                                   |          |          |                 |                     |             |             |             |        |        |
|-------|---------------------------------------------------|----------|----------|-----------------|---------------------|-------------|-------------|-------------|--------|--------|
|       |                                                   |          |          |                 |                     | SB10G006690 | SB10G027280 | SB10G000520 |        |        |
|       |                                                   |          |          |                 |                     | SB10G001350 | SB04G031890 | SB08G021690 |        |        |
|       |                                                   |          |          |                 |                     | SB06G024820 |             |             |        |        |
|       |                                                   |          |          |                 |                     | SB01G019050 | SB01G009330 | SB09G002225 |        |        |
|       |                                                   |          |          |                 |                     | SB01G029650 | SB02G003070 | SB08G021460 |        |        |
|       |                                                   |          |          |                 |                     | SB04G034800 | SB10G027100 | SB08G021080 |        |        |
|       |                                                   |          |          |                 |                     | SB07G000645 | SB01G006020 | SB05G007370 |        |        |
|       |                                                   |          |          |                 |                     | SB04G004430 | SB05G021480 | SB08G021350 |        |        |
|       |                                                   |          |          |                 |                     | SB10G025053 | SB06G015640 | SB06G027465 | miR160 | miR166 |
| 31326 | regulation of cellular biosynthetic process,      | 5.06E-05 | 5.42E-03 | 42/160<br>26.2% | 2757/19262<br>14.3% | SB01G040270 | SB04G030770 | SB06G032500 | miR172 | miR390 |
|       |                                                   |          |          |                 |                     | SB10G027220 | SB06G024630 | SB01G021280 | miR395 | miR397 |
|       |                                                   |          |          |                 |                     | SB01G050333 | SB08G019930 | SB01G010930 | miR528 | miR529 |
|       |                                                   |          |          |                 |                     | SB02G002720 | SB01G012170 | SB04G032590 |        |        |
|       |                                                   |          |          |                 |                     | SB04G032570 | SB06G025710 | SB04G004940 |        |        |
|       |                                                   |          |          |                 |                     | SB10G029190 | SB10G006690 | SB10G027280 |        |        |
|       |                                                   |          |          |                 |                     | SB10G000520 | SB10G001350 | SB09G028700 |        |        |
|       |                                                   |          |          |                 |                     | SB04G031890 | SB08G021690 | SB06G024820 |        |        |
|       |                                                   |          |          |                 |                     | SB01G019050 | SB01G009330 | SB09G002225 |        |        |
|       |                                                   |          |          |                 |                     | SB01G029650 | SB02G003070 | SB08G021460 |        |        |
|       |                                                   |          |          |                 |                     | SB04G034800 | SB10G027100 | SB08G021080 |        |        |
|       |                                                   |          |          |                 |                     | SB07G000645 | SB01G006020 | SB05G007370 |        |        |
|       |                                                   |          |          |                 |                     | SB04G004430 | SB05G021480 | SB08G021350 |        |        |
|       |                                                   |          |          |                 |                     | SB10G025053 | SB06G015640 | SB06G027465 | miR160 | miR166 |
| 9889  | regulation of biosynthetic process,               | 5.14E-05 | 5.42E-03 | 42/160<br>26.2% | 2759/19262<br>14.3% | SB01G040270 | SB04G030770 | SB06G032500 | miR172 | miR390 |
|       |                                                   |          |          |                 |                     | SB10G027220 | SB06G024630 | SB01G021280 | miR395 | miR397 |
|       |                                                   |          |          |                 |                     | SB01G050333 | SB08G019930 | SB01G010930 | miR528 | miR529 |
|       |                                                   |          |          |                 |                     | SB02G002720 | SB01G012170 | SB04G032590 |        |        |
|       |                                                   |          |          |                 |                     | SB04G032570 | SB06G025710 | SB04G004940 |        |        |
|       |                                                   |          |          |                 |                     | SB10G029190 | SB10G006690 | SB10G027280 |        |        |
|       |                                                   |          |          |                 |                     | SB10G000520 | SB10G001350 | SB09G028700 |        |        |
|       |                                                   |          |          |                 |                     | SB04G031890 | SB08G021690 | SB06G024820 |        |        |
|       |                                                   |          |          |                 |                     | SB01G019050 | SB01G009330 | SB09G002225 |        |        |
|       |                                                   |          |          |                 |                     | SB02G003070 | SB01G029650 | SB08G021460 |        |        |
|       |                                                   |          |          |                 |                     | SB04G034800 | SB10G027100 | SB08G021080 |        |        |
|       |                                                   |          |          |                 |                     | SB07G000645 | SB01G006020 | SB04G004430 |        |        |
|       |                                                   |          |          |                 |                     | SB05G021480 | SB08G021350 | SB10G025053 | miR160 | miR166 |
| 10556 | regulation of macromolecule biosynthetic process, | 6.29E-05 | 5.71E-03 | 41/160<br>25.6% | 2689/19262<br>13.9% | SB06G015640 | SB06G027465 | SB01G040270 | miR172 | miR390 |
|       |                                                   |          |          |                 |                     | SB04G030770 | SB06G032500 | SB10G027220 | miR395 | miR397 |
|       |                                                   |          |          |                 |                     | SB06G024630 | SB01G021280 | SB01G050333 | miR528 | miR529 |
|       |                                                   |          |          |                 |                     | SB08G019930 | SB01G010930 | SB02G002720 |        |        |
|       |                                                   |          |          |                 |                     | SB01G012170 | SB04G032590 | SB04G032570 |        |        |
|       |                                                   |          |          |                 |                     | SB06G025710 | SB04G004940 | SB10G029190 |        |        |
|       |                                                   |          |          |                 |                     | SB10G006690 | SB10G027280 | SB10G000520 |        |        |
|       |                                                   |          |          |                 |                     | SB10G001350 | SB09G028700 | SB04G031890 |        |        |

| Gene ID | Gene Name                                          | P-value  | Q-value  | Count  | Percentage | SB IDs                                                                                                                                                                                                                                                                                                                                                                                                                                                                                                                                                                                                                                                                                                                                                                                                                                                                                                                                                                                                                                                                                                                                                                                                                                                                                                                                                                                                                                                                                                                                                                                                                                          | miRNAs                                                           |
|---------|----------------------------------------------------|----------|----------|--------|------------|-------------------------------------------------------------------------------------------------------------------------------------------------------------------------------------------------------------------------------------------------------------------------------------------------------------------------------------------------------------------------------------------------------------------------------------------------------------------------------------------------------------------------------------------------------------------------------------------------------------------------------------------------------------------------------------------------------------------------------------------------------------------------------------------------------------------------------------------------------------------------------------------------------------------------------------------------------------------------------------------------------------------------------------------------------------------------------------------------------------------------------------------------------------------------------------------------------------------------------------------------------------------------------------------------------------------------------------------------------------------------------------------------------------------------------------------------------------------------------------------------------------------------------------------------------------------------------------------------------------------------------------------------|------------------------------------------------------------------|
| 51171   | regulation of nitrogen compound metabolic process, | 6.62E-05 | 5.71E-03 | 42/160 | 26.2%      | SB08G021690 SB06G024820<br>SB01G019050 SB01G009330 SB09G002225<br>SB01G029650 SB02G003070 SB08G021460<br>SB04G034800 SB10G027100 SB01G016830<br>SB08G021080 SB07G000645 SB01G006020<br>SB05G007370 SB04G004430 SB05G021480<br>SB08G021350 SB10G025053 SB06G015640<br>SB06G027465 SB01G040270 SB04G030770<br>SB06G032500 SB10G027220 SB06G024630<br>SB01G021280 SB01G050333 SB08G019930<br>SB01G010930 SB02G002720 SB01G012170<br>SB04G032590 SB04G032570 SB06G025710<br>SB04G004940 SB10G029190 SB10G006690<br>SB10G027280 SB10G000520 SB10G001350<br>SB04G031890 SB08G021690 SB06G024820<br>SB01G019050 SB01G009330 SB09G002225<br>SB01G029650 SB02G003070 SB08G021460<br>SB04G034800 SB10G027100 SB01G016830<br>SB08G021080 SB07G000645 SB01G006020<br>SB04G004430 SB05G021480 SB08G021350<br>SB10G025053 SB06G015640 SB06G027465<br>SB01G040270 SB04G030770 SB06G032500<br>SB10G027220 SB06G024630 SB01G021280<br>SB01G050333 SB08G019930 SB01G010930<br>SB02G002720 SB01G012170 SB04G032590<br>SB04G032570 SB06G025710 SB09G019410<br>SB04G004940 SB10G029190 SB10G006690<br>SB10G027280 SB04G011020 SB10G000520<br>SB10G001350 SB01G000490 SB09G028700<br>SB04G031890 SB08G021690 SB06G024820<br>SB01G019050 SB01G009330 SB09G002225<br>SB01G029650 SB02G003070 SB08G021460<br>SB04G034800 SB10G027100 SB08G021080<br>SB07G000645 SB01G006020 SB04G004430<br>SB05G021480 SB08G021350 SB10G025053<br>SB06G015640 SB06G027465 SB01G040270<br>SB04G030770 SB06G032500 SB10G027220<br>SB06G024630 SB01G021280 SB01G050333<br>SB08G019930 SB01G010930 SB02G002720<br>SB01G012170 SB04G032590 SB04G032570<br>SB06G025710 SB09G019410 SB04G004940 | miR160 miR166<br>miR172 miR390<br>miR395 miR397<br>miR528 miR529 |
| 60255   | regulation of macromolecule metabolic process,     | 1.15E-04 | 8.16E-03 | 45/160 | 28.1%      | SB08G021690 SB06G024820<br>SB01G019050 SB01G009330 SB09G002225<br>SB01G029650 SB02G003070 SB08G021460<br>SB04G034800 SB10G027100 SB01G016830<br>SB08G021080 SB07G000645 SB01G006020<br>SB04G004430 SB05G021480 SB08G021350<br>SB10G025053 SB06G015640 SB06G027465<br>SB01G040270 SB04G030770 SB06G032500<br>SB10G027220 SB06G024630 SB01G021280<br>SB01G050333 SB08G019930 SB01G010930<br>SB02G002720 SB01G012170 SB04G032590<br>SB04G032570 SB06G025710 SB09G019410<br>SB04G004940 SB10G029190 SB10G006690<br>SB10G027280 SB04G011020 SB10G000520<br>SB10G001350 SB01G000490 SB09G028700<br>SB04G031890 SB08G021690 SB06G024820<br>SB01G019050 SB01G009330 SB09G002225<br>SB01G029650 SB02G003070 SB08G021460<br>SB04G034800 SB10G027100 SB08G021080<br>SB07G000645 SB01G006020 SB04G004430<br>SB05G021480 SB08G021350 SB10G025053<br>SB06G015640 SB06G027465 SB01G040270<br>SB04G030770 SB06G032500 SB10G027220<br>SB06G024630 SB01G021280 SB01G050333<br>SB08G019930 SB01G010930 SB02G002720<br>SB01G012170 SB04G032590 SB04G032570<br>SB06G025710 SB09G019410 SB04G004940                                                                                                                                                                                                                                                                                                                                                                                                                                                                                                                                                                   | miR160 miR166<br>miR172 miR390<br>miR395 miR397<br>miR528 miR529 |
| 10468   | regulation of gene expression,                     | 1.69E-04 | 8.42E-03 | 42/160 | 26.2%      | SB08G021690 SB06G024820<br>SB01G019050 SB01G009330 SB09G002225<br>SB01G029650 SB02G003070 SB08G021460<br>SB04G034800 SB10G027100 SB01G016830<br>SB08G021080 SB07G000645 SB01G006020<br>SB05G007370 SB04G004430 SB05G021480<br>SB08G021350 SB10G025053 SB06G015640<br>SB06G027465 SB01G040270 SB04G030770<br>SB06G032500 SB10G027220 SB06G024630<br>SB01G021280 SB01G050333 SB08G019930<br>SB01G010930 SB02G002720<br>SB01G012170 SB04G032590 SB04G032570<br>SB06G025710 SB09G019410 SB04G004940                                                                                                                                                                                                                                                                                                                                                                                                                                                                                                                                                                                                                                                                                                                                                                                                                                                                                                                                                                                                                                                                                                                                                 | miR160 miR166<br>miR172 miR390<br>miR395 miR397<br>miR528 miR529 |

|       |                                           |          |          |                 |                     |             |             |             |        |        |
|-------|-------------------------------------------|----------|----------|-----------------|---------------------|-------------|-------------|-------------|--------|--------|
|       |                                           |          |          |                 |                     | SB10G029190 | SB10G006690 | SB10G027280 |        |        |
|       |                                           |          |          |                 |                     | SB10G000520 | SB10G001350 | SB09G028700 |        |        |
|       |                                           |          |          |                 |                     | SB04G031890 | SB08G021690 | SB06G024820 |        |        |
|       |                                           |          |          |                 |                     | SB01G019050 | SB01G009330 | SB09G002225 |        |        |
|       |                                           |          |          |                 |                     | SB01G029650 | SB02G003070 | SB08G021460 |        |        |
|       |                                           |          |          |                 |                     | SB04G034800 | SB10G027100 | SB01G016830 |        |        |
|       |                                           |          |          |                 |                     | SB08G021080 | SB07G000645 | SB01G006020 |        |        |
|       |                                           |          |          |                 |                     | SB05G007370 | SB04G004430 | SB05G021480 |        |        |
|       |                                           |          |          |                 |                     | SB08G021350 | SB10G025053 | SB06G015640 |        |        |
| 31323 | regulation of cellular metabolic process, | 1.87E-04 | 8.86E-03 | 45/160<br>28.1% | 3211/19262<br>16.6% | SB06G027465 | SB01G040270 | SB04G030770 | miR160 | miR166 |
|       |                                           |          |          |                 |                     | SB06G032500 | SB10G027220 | SB06G024630 | miR172 | miR390 |
|       |                                           |          |          |                 |                     | SB01G021280 | SB07G002195 | SB01G050333 | miR395 | miR397 |
|       |                                           |          |          |                 |                     | SB08G019930 | SB01G010930 | SB02G002720 | miR528 | miR529 |
|       |                                           |          |          |                 |                     | SB01G012170 | SB04G032590 | SB04G032570 |        |        |
|       |                                           |          |          |                 |                     | SB06G025710 | SB04G004940 | SB10G029190 |        |        |
|       |                                           |          |          |                 |                     | SB10G006690 | SB10G027280 | SB04G011020 |        |        |
|       |                                           |          |          |                 |                     | SB10G000520 | SB10G001350 | SB09G028700 |        |        |
|       |                                           |          |          |                 |                     | SB04G031890 | SB08G021690 | SB06G024820 |        |        |
|       |                                           |          |          |                 |                     | SB01G019050 | SB03G025480 | SB01G009330 |        |        |
|       |                                           |          |          |                 |                     | SB09G002225 | SB10G022170 | SB04G003135 |        |        |
|       |                                           |          |          |                 |                     | SB02G003070 | SB08G021460 | SB03G025340 |        |        |
|       |                                           |          |          |                 |                     | SB04G025540 | SB10G027100 | SB08G001450 |        |        |
|       |                                           |          |          |                 |                     | SB01G035230 | SB02G031370 | SB08G021080 |        |        |
|       |                                           |          |          |                 |                     | SB05G007370 | SB04G004430 | SB08G021350 |        |        |
|       |                                           |          |          |                 |                     | SB01G040270 | SB04G030770 | SB06G024630 |        |        |
|       |                                           |          |          |                 |                     | SB01G021280 | SB01G010930 | SB08G019930 |        |        |
|       |                                           |          |          |                 |                     | SB02G002720 | SB01G012170 | SB03G002580 |        |        |
|       |                                           |          |          |                 |                     | SB04G010990 | SB06G025710 | SB04G004940 |        |        |
|       |                                           |          |          |                 |                     | SB01G049280 | SB07G022880 | SB03G028400 | miR160 | miR164 |
|       |                                           |          |          |                 |                     | SB10G006690 | SB10G027280 | SB04G011020 | miR166 | miR172 |
| 65007 | biological regulation,                    | 1.37E-04 | 8.16E-03 | 76/160<br>47.5% | 6424/19262<br>33.3% | SB10G001310 | SB02G013180 | SB10G001350 | miR319 | miR390 |
|       |                                           |          |          |                 |                     | SB01G000490 | SB09G028700 | SB04G031890 | miR395 | miR397 |
|       |                                           |          |          |                 |                     | SB08G021690 | SB06G022560 | SB07G018020 | miR528 | miR529 |
|       |                                           |          |          |                 |                     | SB03G039890 | SB08G000480 | SB09G022130 |        |        |
|       |                                           |          |          |                 |                     | SB01G029650 | SB04G034800 | SB02G005920 |        |        |
|       |                                           |          |          |                 |                     | SB03G040700 | SB01G016830 | SB07G000645 |        |        |
|       |                                           |          |          |                 |                     | SB01G006020 | SB05G021480 | SB10G025053 |        |        |
|       |                                           |          |          |                 |                     | SB06G015640 | SB06G027465 | SB06G032500 |        |        |
|       |                                           |          |          |                 |                     | SB10G027220 | SB07G002195 | SB01G050333 |        |        |
|       |                                           |          |          |                 |                     | SB03G034440 | SB03G047160 | SB03G025700 |        |        |
|       |                                           |          |          |                 |                     | SB04G032590 | SB04G032570 | SB09G019410 |        |        |
|       |                                           |          |          |                 |                     | SB08G000660 | SB10G029190 | SB02G008860 |        |        |
|       |                                           |          |          |                 |                     | SB01G018450 | SB10G000520 | SB05G000450 |        |        |
|       |                                           |          |          |                 |                     | SB06G024820 |             |             |        |        |



GRMZM2G031001 GRMZM2G178261  
 GRMZM2G079727 GRMZM2G078274  
 GRMZM2G001139 GRMZM2G164020  
 AC210792.5 GRMZM2G105335

GRMZM2G098594 AC233853.1  
 GRMZM2G098696 GRMZM2G435219  
 GRMZM2G063522 GRMZM2G125777  
 GRMZM2G114850 GRMZM2G009892  
 GRMZM2G378580 AC197246.3  
 GRMZM2G073750 GRMZM2G048993  
 GRMZM2G099862 GRMZM2G067743  
 GRMZM2G018414 GRMZM2G089640  
 GRMZM2G146380 GRMZM2G129147  
 GRMZM2G004619 GRMZM2G035405  
 AY530952.1 GRMZM2G031001  
 GRMZM2G041223 GRMZM2G178261  
 GRMZM2G079727 GRMZM2G034876  
 GRMZM2G028980 GRMZM2G139700  
 GRMZM2G088842 GRMZM2G078274  
 GRMZM2G334165 GRMZM2G001139  
 GRMZM2G087095 GRMZM2G393433  
 GRMZM2G385641 GRMZM2G125243  
 GRMZM2G475882 GRMZM2G124566  
 AC210792.5 GRMZM2G146688  
 GRMZM2G164909 GRMZM2G017414  
 AC233899.1 GRMZM2G435255  
 GRMZM2G105335

miR156 miR159  
 miR164 miR167  
 miR169 miR395  
 miR396 miR528

6350 transcription 2.43E-05 7.16E-04 45/174 2364/16863  
 25.8% 14.0%

| METABOLIC PROCESS |       |                  |           |          |          |                |                     |                                                                                                                                                                                                    |                                                                                                                                                                                                    |                            |                  |
|-------------------|-------|------------------|-----------|----------|----------|----------------|---------------------|----------------------------------------------------------------------------------------------------------------------------------------------------------------------------------------------------|----------------------------------------------------------------------------------------------------------------------------------------------------------------------------------------------------|----------------------------|------------------|
| Osa_UR            | 44237 | cellular process | metabolic | 1.72E-03 | 1.84E-02 | 25/95<br>26.3% | 6557/45432<br>14.4% | LOC_OS03G60430<br>LOC_OS11G06020<br>LOC_OS02G58640<br>LOC_OS10G05069<br>LOC_OS03G53230<br>LOC_OS01G12700<br>LOC_OS03G03610<br>LOC_OS07G01460<br>LOC_OS03G52239<br>LOC_OS01G46570<br>LOC_OS03G15120 | LOC_OS05G41166<br>LOC_OS11G40400<br>LOC_OS04G46384<br>LOC_OS06G43220<br>LOC_OS02G15760<br>LOC_OS05G05810<br>LOC_OS06G08810<br>LOC_OS10G06810<br>LOC_OS07G13170<br>LOC_OS05G03040<br>LOC_OS10G40600 | miR159<br>miR172<br>miR395 | miR171<br>miR393 |

|       |                                             |          |          |                |                     | LOC_OS01G53280<br>LOC_OS01G52500                                                                                                                                                                                                                                                             | LOC_OS12G19180                                                                                                                                                                                                                                                                               |                                      |                                      |
|-------|---------------------------------------------|----------|----------|----------------|---------------------|----------------------------------------------------------------------------------------------------------------------------------------------------------------------------------------------------------------------------------------------------------------------------------------------|----------------------------------------------------------------------------------------------------------------------------------------------------------------------------------------------------------------------------------------------------------------------------------------------|--------------------------------------|--------------------------------------|
| 8152  | metabolic process                           | 2.68E-03 | 2.00E-02 | 32/95<br>33.6% | 9518/45432<br>20.9% | LOC_OS03G22634<br>LOC_OS05G41166<br>LOC_OS11G40400<br>LOC_OS04G46384<br>LOC_OS11G10750<br>LOC_OS03G53230<br>LOC_OS01G12700<br>LOC_OS03G03610<br>LOC_OS06G40700<br>LOC_OS10G06810<br>LOC_OS07G13170<br>LOC_OS01G46570<br>LOC_OS05G03040<br>LOC_OS10G40600<br>LOC_OS12G19180<br>LOC_OS12G25700 | LOC_OS03G60430<br>LOC_OS11G06020<br>LOC_OS02G58640<br>LOC_OS10G05069<br>LOC_OS06G43220<br>LOC_OS02G15760<br>LOC_OS05G05810<br>LOC_OS06G08810<br>LOC_OS07G01460<br>LOC_OS03G52239<br>LOC_OS05G23924<br>LOC_OS03G07140<br>LOC_OS03G15120<br>LOC_OS01G53280<br>LOC_OS04G04950<br>LOC_OS01G52500 | miR159<br>miR171<br>miR393<br>miR397 | miR168<br>miR172<br>miR395<br>miR398 |
| 9058  | biosynthetic process                        | 1.20E-03 | 1.84E-02 | 16/95<br>16.8% | 3274/45432<br>7.2%  | LOC_OS06G43220<br>LOC_OS02G15760<br>LOC_OS03G03610<br>LOC_OS11G06020<br>LOC_OS07G13170<br>LOC_OS05G03040<br>LOC_OS10G40600<br>LOC_OS04G46384                                                                                                                                                 | LOC_OS03G60430<br>LOC_OS01G12700<br>LOC_OS05G41166<br>LOC_OS03G52239<br>LOC_OS01G46570<br>LOC_OS03G15120<br>LOC_OS01G53280<br>LOC_OS12G19180                                                                                                                                                 | miR159<br>miR172<br>miR395           | miR171<br>miR393                     |
| 44249 | cellular biosynthetic process               | 5.73E-04 | 1.84E-02 | 16/95<br>16.8% | 3054/45432<br>6.7%  | LOC_OS06G43220<br>LOC_OS02G15760<br>LOC_OS03G03610<br>LOC_OS11G06020<br>LOC_OS07G13170<br>LOC_OS05G03040<br>LOC_OS10G40600<br>LOC_OS04G46384                                                                                                                                                 | LOC_OS03G60430<br>LOC_OS01G12700<br>LOC_OS05G41166<br>LOC_OS03G52239<br>LOC_OS01G46570<br>LOC_OS03G15120<br>LOC_OS01G53280<br>LOC_OS12G19180                                                                                                                                                 | miR159<br>miR172<br>miR395           | miR171<br>miR393                     |
| 6310  | DNA recombination                           | 6.48E-04 | 1.84E-02 | 3/95<br>3.1%   | 80/45432 0.1%       | LOC_OS05G05810<br>LOC_OS10G06810                                                                                                                                                                                                                                                             | LOC_OS07G01460                                                                                                                                                                                                                                                                               | miR395                               |                                      |
| 34645 | cellular macromolecule biosynthetic process | 8.24E-04 | 1.84E-02 | 14/95<br>14.7% | 2546/45432<br>5.6%  | LOC_OS06G43220<br>LOC_OS03G60430<br>LOC_OS03G03610<br>LOC_OS11G06020<br>LOC_OS07G13170<br>LOC_OS10G40600<br>LOC_OS04G46384                                                                                                                                                                   | LOC_OS02G15760<br>LOC_OS01G12700<br>LOC_OS05G41166<br>LOC_OS03G52239<br>LOC_OS05G03040<br>LOC_OS01G53280<br>LOC_OS12G19180                                                                                                                                                                   | miR159<br>miR172<br>miR395           | miR171<br>miR393                     |

|        |                                    |                                     |          |                |                    |                                                                                                                            |                                                                                                                            |                            |                                             |                            |
|--------|------------------------------------|-------------------------------------|----------|----------------|--------------------|----------------------------------------------------------------------------------------------------------------------------|----------------------------------------------------------------------------------------------------------------------------|----------------------------|---------------------------------------------|----------------------------|
| 9059   | macromolecule biosynthetic process | 8.37E-04                            | 1.84E-02 | 14/95<br>14.7% | 2550/45432<br>5.6% | LOC_OS06G43220<br>LOC_OS03G60430<br>LOC_OS03G03610<br>LOC_OS11G06020<br>LOC_OS07G13170<br>LOC_OS10G40600<br>LOC_OS04G46384 | LOC_OS02G15760<br>LOC_OS01G12700<br>LOC_OS05G41166<br>LOC_OS03G52239<br>LOC_OS05G03040<br>LOC_OS01G53280<br>LOC_OS12G19180 | miR159<br>miR172<br>miR395 | miR171<br>miR393                            |                            |
| zma_OR | 90304                              | nucleic acid metabolic process      | 6.88E-05 | 1.35E-03       | 52/174<br>29.8%    | 3013/16863<br>17.8%                                                                                                        | GRMZM2G097640                                                                                                              | GRMZM2G063522              | miR156<br>miR164<br>miR169<br>miR396 miR528 | miR159<br>miR167<br>miR395 |
|        |                                    |                                     |          |                |                    |                                                                                                                            | GRMZM2G435219                                                                                                              | GRMZM2G125777              |                                             |                            |
| zma_OR | 6807                               | nitrogen compound metabolic process | 9.33E-04 | 7.86E-03       | 59/174<br>33.9%    | 3932/16863<br>23.3%                                                                                                        | GRMZM2G009892                                                                                                              | GRMZM2G114850              | miR156<br>miR164<br>miR169<br>miR396 miR528 | miR159<br>miR167<br>miR395 |
|        |                                    |                                     |          |                |                    |                                                                                                                            | AC212570.3 AC197246.3                                                                                                      | GRMZM2G073750              |                                             |                            |
| zma_OR | 6807                               | nitrogen compound metabolic process | 9.33E-04 | 7.86E-03       | 59/174<br>33.9%    | 3932/16863<br>23.3%                                                                                                        | GRMZM2G048993                                                                                                              | GRMZM2G099862              | miR156<br>miR164<br>miR169<br>miR396 miR528 | miR159<br>miR167<br>miR395 |
|        |                                    |                                     |          |                |                    |                                                                                                                            | GRMZM2G067743                                                                                                              | GRMZM2G018414              |                                             |                            |
| zma_OR | 6807                               | nitrogen compound metabolic process | 9.33E-04 | 7.86E-03       | 59/174<br>33.9%    | 3932/16863<br>23.3%                                                                                                        | GRMZM2G377589                                                                                                              | GRMZM2G043453              | miR156<br>miR164<br>miR169<br>miR396 miR528 | miR159<br>miR167<br>miR395 |
|        |                                    |                                     |          |                |                    |                                                                                                                            | GRMZM2G034876                                                                                                              | GRMZM2G028980              |                                             |                            |
| zma_OR | 6807                               | nitrogen compound metabolic process | 9.33E-04 | 7.86E-03       | 59/174<br>33.9%    | 3932/16863<br>23.3%                                                                                                        | GRMZM2G139700                                                                                                              | GRMZM2G088842              | miR156<br>miR164<br>miR169<br>miR396 miR528 | miR159<br>miR167<br>miR395 |
|        |                                    |                                     |          |                |                    |                                                                                                                            | GRMZM2G104262                                                                                                              | GRMZM2G334165              |                                             |                            |
| zma_OR | 6807                               | nitrogen compound metabolic process | 9.33E-04 | 7.86E-03       | 59/174<br>33.9%    | 3932/16863<br>23.3%                                                                                                        | GRMZM2G393433                                                                                                              | GRMZM2G087095              | miR156<br>miR164<br>miR169<br>miR396 miR528 | miR159<br>miR167<br>miR395 |
|        |                                    |                                     |          |                |                    |                                                                                                                            | GRMZM2G385641                                                                                                              | GRMZM2G125243              |                                             |                            |
| zma_OR | 6807                               | nitrogen compound metabolic process | 9.33E-04 | 7.86E-03       | 59/174<br>33.9%    | 3932/16863<br>23.3%                                                                                                        | GRMZM2G475882                                                                                                              | GRMZM2G124566              | miR156<br>miR164<br>miR169<br>miR396 miR528 | miR159<br>miR167<br>miR395 |
|        |                                    |                                     |          |                |                    |                                                                                                                            | GRMZM2G146688                                                                                                              | GRMZM2G164909              |                                             |                            |
| zma_OR | 6807                               | nitrogen compound metabolic process | 9.33E-04 | 7.86E-03       | 59/174<br>33.9%    | 3932/16863<br>23.3%                                                                                                        | GRMZM2G017414                                                                                                              | AC233899.1                 | miR156<br>miR164<br>miR169<br>miR396 miR528 | miR159<br>miR167<br>miR395 |
|        |                                    |                                     |          |                |                    |                                                                                                                            | GRMZM2G098594                                                                                                              | GRMZM2G098696              |                                             |                            |
| zma_OR | 6807                               | nitrogen compound metabolic process | 9.33E-04 | 7.86E-03       | 59/174<br>33.9%    | 3932/16863<br>23.3%                                                                                                        | AC233853.1                                                                                                                 | GRMZM2G089640              | miR156<br>miR164<br>miR169<br>miR396 miR528 | miR159<br>miR167<br>miR395 |
|        |                                    |                                     |          |                |                    |                                                                                                                            | GRMZM2G378580                                                                                                              | GRMZM2G146380              |                                             |                            |
| zma_OR | 6807                               | nitrogen compound metabolic process | 9.33E-04 | 7.86E-03       | 59/174<br>33.9%    | 3932/16863<br>23.3%                                                                                                        | GRMZM2G129147                                                                                                              | GRMZM2G035405              | miR156<br>miR164<br>miR169<br>miR396 miR528 | miR159<br>miR167<br>miR395 |
|        |                                    |                                     |          |                |                    |                                                                                                                            | GRMZM2G004619                                                                                                              | GRMZM2G041223              |                                             |                            |
| zma_OR | 6807                               | nitrogen compound metabolic process | 9.33E-04 | 7.86E-03       | 59/174<br>33.9%    | 3932/16863<br>23.3%                                                                                                        | AY530952.1                                                                                                                 | GRMZM2G031001              | miR156<br>miR164<br>miR169<br>miR396 miR528 | miR159<br>miR167<br>miR395 |
|        |                                    |                                     |          |                |                    |                                                                                                                            | GRMZM2G112598                                                                                                              | GRMZM2G079727              |                                             |                            |
| zma_OR | 6807                               | nitrogen compound metabolic process | 9.33E-04 | 7.86E-03       | 59/174<br>33.9%    | 3932/16863<br>23.3%                                                                                                        | GRMZM2G178261                                                                                                              | GRMZM2G041352              | miR156<br>miR164<br>miR169<br>miR396 miR528 | miR159<br>miR167<br>miR395 |
|        |                                    |                                     |          |                |                    |                                                                                                                            | GRMZM2G078274                                                                                                              | AC210792.5                 |                                             |                            |
| zma_OR | 6807                               | nitrogen compound metabolic process | 9.33E-04 | 7.86E-03       | 59/174<br>33.9%    | 3932/16863<br>23.3%                                                                                                        | GRMZM2G001139                                                                                                              | GRMZM2G063522              | miR156<br>miR164<br>miR169<br>miR396 miR528 | miR159<br>miR167<br>miR395 |
|        |                                    |                                     |          |                |                    |                                                                                                                            | GRMZM2G105335                                                                                                              | GRMZM2G125777              |                                             |                            |
| zma_OR | 6807                               | nitrogen compound metabolic process | 9.33E-04 | 7.86E-03       | 59/174<br>33.9%    | 3932/16863<br>23.3%                                                                                                        | GRMZM2G097640                                                                                                              | GRMZM2G009892              | miR156<br>miR164<br>miR169<br>miR396 miR528 | miR159<br>miR167<br>miR395 |
|        |                                    |                                     |          |                |                    |                                                                                                                            | GRMZM2G435219                                                                                                              | GRMZM2G174807              |                                             |                            |
| zma_OR | 6807                               | nitrogen compound metabolic process | 9.33E-04 | 7.86E-03       | 59/174<br>33.9%    | 3932/16863<br>23.3%                                                                                                        | GRMZM2G114850                                                                                                              | GRMZM2G377589              | miR156<br>miR164<br>miR169<br>miR396 miR528 | miR159<br>miR167<br>miR395 |
|        |                                    |                                     |          |                |                    |                                                                                                                            | AC212570.3 AC197246.3                                                                                                      | GRMZM2G034876              |                                             |                            |
| zma_OR | 6807                               | nitrogen compound metabolic process | 9.33E-04 | 7.86E-03       | 59/174<br>33.9%    | 3932/16863<br>23.3%                                                                                                        | GRMZM2G048993                                                                                                              | GRMZM2G028980              | miR156<br>miR164<br>miR169<br>miR396 miR528 | miR159<br>miR167<br>miR395 |
|        |                                    |                                     |          |                |                    |                                                                                                                            | GRMZM2G099862                                                                                                              | GRMZM2G088842              |                                             |                            |
| zma_OR | 6807                               | nitrogen compound metabolic process | 9.33E-04 | 7.86E-03       | 59/174<br>33.9%    | 3932/16863<br>23.3%                                                                                                        | GRMZM2G018414                                                                                                              | GRMZM2G334165              | miR156<br>miR164<br>miR169<br>miR396 miR528 | miR159<br>miR167<br>miR395 |
|        |                                    |                                     |          |                |                    |                                                                                                                            | GRMZM2G043453                                                                                                              | GRMZM2G087095              |                                             |                            |
| zma_OR | 6807                               | nitrogen compound metabolic process | 9.33E-04 | 7.86E-03       | 59/174<br>33.9%    | 3932/16863<br>23.3%                                                                                                        | AC233751.1                                                                                                                 | GRMZM2G125243              | miR156<br>miR164<br>miR169<br>miR396 miR528 | miR159<br>miR167<br>miR395 |
|        |                                    |                                     |          |                |                    |                                                                                                                            | GRMZM2G139700                                                                                                              | GRMZM2G124566              |                                             |                            |
| zma_OR | 6807                               | nitrogen compound metabolic process | 9.33E-04 | 7.86E-03       | 59/174<br>33.9%    | 3932/16863<br>23.3%                                                                                                        | GRMZM2G104262                                                                                                              | GRMZM2G164909              | miR156<br>miR164<br>miR169<br>miR396 miR528 | miR159<br>miR167<br>miR395 |
|        |                                    |                                     |          |                |                    |                                                                                                                            | GRMZM2G393433                                                                                                              | AC233899.1                 |                                             |                            |
| zma_OR | 6807                               | nitrogen compound metabolic process | 9.33E-04 | 7.86E-03       | 59/174<br>33.9%    | 3932/16863<br>23.3%                                                                                                        | GRMZM2G385641                                                                                                              | GRMZM2G124566              | miR156<br>miR164<br>miR169<br>miR396 miR528 | miR159<br>miR167<br>miR395 |
|        |                                    |                                     |          |                |                    |                                                                                                                            | GRMZM2G475882                                                                                                              | GRMZM2G164909              |                                             |                            |
| zma_OR | 6807                               | nitrogen compound metabolic process | 9.33E-04 | 7.86E-03       | 59/174<br>33.9%    | 3932/16863<br>23.3%                                                                                                        | GRMZM2G146688                                                                                                              | AC233899.1                 | miR156<br>miR164<br>miR169<br>miR396 miR528 | miR159<br>miR167<br>miR395 |
|        |                                    |                                     |          |                |                    |                                                                                                                            | GRMZM2G017414                                                                                                              |                            |                                             |                            |



|               |                           |                    |          |          |                 |                     |               |               |                                                |                            |               |
|---------------|---------------------------|--------------------|----------|----------|-----------------|---------------------|---------------|---------------|------------------------------------------------|----------------------------|---------------|
| 34641         | cellular compound process | nitrogen metabolic | 9.33E-04 | 7.86E-03 | 59/174<br>33.9% | 3932/16863<br>23.3% | GRMZM2G435255 | GRMZM2G098594 | miR156<br>miR164<br>miR169<br>miR396<br>miR528 | miR159<br>miR167<br>miR395 |               |
|               |                           |                    |          |          |                 |                     | AC210013.4    | GRMZM2G097258 |                                                |                            | AC233853.1    |
|               |                           |                    |          |          |                 |                     | GRMZM2G098696 | GRMZM2G378580 |                                                |                            |               |
|               |                           |                    |          |          |                 |                     | GRMZM2G086869 | GRMZM2G089640 |                                                |                            |               |
|               |                           |                    |          |          |                 |                     | GRMZM2G146380 | GRMZM2G129147 |                                                |                            |               |
|               |                           |                    |          |          |                 |                     | GRMZM2G004619 | GRMZM2G071589 |                                                |                            |               |
|               |                           |                    |          |          |                 |                     | GRMZM2G035405 | AY530952.1    |                                                |                            |               |
|               |                           |                    |          |          |                 |                     | GRMZM2G031001 | GRMZM2G041223 |                                                |                            |               |
|               |                           |                    |          |          |                 |                     | GRMZM2G112598 | GRMZM2G178261 |                                                |                            |               |
|               |                           |                    |          |          |                 |                     | GRMZM2G079727 | GRMZM2G078274 |                                                |                            |               |
|               |                           |                    |          |          |                 |                     | GRMZM2G041352 | GRMZM2G001139 |                                                |                            |               |
|               |                           |                    |          |          |                 |                     | GRMZM2G478709 | AC210792.5    |                                                |                            |               |
|               |                           |                    |          |          |                 |                     | GRMZM2G105335 |               |                                                |                            |               |
|               |                           |                    |          |          |                 |                     | GRMZM2G097640 | GRMZM2G063522 |                                                |                            |               |
|               |                           |                    |          |          |                 |                     | GRMZM2G435219 | GRMZM2G125777 |                                                |                            |               |
|               |                           |                    |          |          |                 |                     | GRMZM2G114850 | GRMZM2G009892 |                                                |                            |               |
|               |                           |                    |          |          |                 |                     | AC212570.3    | AC197246.3    |                                                |                            | GRMZM2G073750 |
|               |                           |                    |          |          |                 |                     | GRMZM2G048993 | GRMZM2G174807 |                                                |                            |               |
|               |                           |                    |          |          |                 |                     | GRMZM2G099862 | GRMZM2G067743 |                                                |                            |               |
|               |                           |                    |          |          |                 |                     | GRMZM2G018414 | GRMZM2G377589 |                                                |                            |               |
|               |                           |                    |          |          |                 |                     | GRMZM2G043453 | GRMZM2G034876 |                                                |                            |               |
|               |                           |                    |          |          |                 |                     | AC233751.1    | GRMZM2G028980 |                                                |                            |               |
|               |                           |                    |          |          |                 |                     | GRMZM2G139700 | GRMZM2G088842 |                                                |                            |               |
|               |                           |                    |          |          |                 |                     | GRMZM2G104262 | GRMZM2G334165 |                                                |                            |               |
|               |                           |                    |          |          |                 |                     | GRMZM2G393433 | GRMZM2G087095 |                                                |                            |               |
|               |                           |                    |          |          |                 |                     | GRMZM2G385641 | GRMZM2G125243 |                                                |                            |               |
|               |                           |                    |          |          |                 |                     | GRMZM2G475882 | GRMZM2G124566 |                                                |                            |               |
|               |                           |                    |          |          |                 |                     | GRMZM2G146688 | GRMZM2G164909 |                                                |                            |               |
|               |                           |                    |          |          |                 |                     | GRMZM2G017414 | AC233899.1    |                                                |                            |               |
|               |                           |                    |          |          |                 |                     | GRMZM2G435255 | GRMZM2G098594 |                                                |                            |               |
|               |                           |                    |          |          |                 |                     | AC210013.4    | GRMZM2G097258 |                                                |                            | AC233853.1    |
|               |                           |                    |          |          |                 |                     | GRMZM2G098696 | GRMZM2G378580 |                                                |                            |               |
|               |                           |                    |          |          |                 |                     | GRMZM2G086869 | GRMZM2G089640 |                                                |                            |               |
| GRMZM2G146380 | GRMZM2G129147             |                    |          |          |                 |                     |               |               |                                                |                            |               |
| GRMZM2G004619 | GRMZM2G071589             |                    |          |          |                 |                     |               |               |                                                |                            |               |
| GRMZM2G035405 | AY530952.1                |                    |          |          |                 |                     |               |               |                                                |                            |               |
| GRMZM2G031001 | GRMZM2G041223             |                    |          |          |                 |                     |               |               |                                                |                            |               |
| GRMZM2G112598 | GRMZM2G178261             |                    |          |          |                 |                     |               |               |                                                |                            |               |
| GRMZM2G079727 | GRMZM2G078274             |                    |          |          |                 |                     |               |               |                                                |                            |               |
| GRMZM2G041352 | GRMZM2G001139             |                    |          |          |                 |                     |               |               |                                                |                            |               |
| GRMZM2G478709 | AC210792.5                |                    |          |          |                 |                     |               |               |                                                |                            |               |
| GRMZM2G105335 |                           |                    |          |          |                 |                     |               |               |                                                |                            |               |

|               |                                                                       |          |          |                 |                     |               |               |                                                |                            |               |
|---------------|-----------------------------------------------------------------------|----------|----------|-----------------|---------------------|---------------|---------------|------------------------------------------------|----------------------------|---------------|
| 6139          | nucleobase, nucleoside, nucleotide and nucleic acid metabolic process | 9.33E-04 | 7.86E-03 | 59/174<br>33.9% | 3932/16863<br>23.3% | GRMZM2G097640 | GRMZM2G063522 | miR156<br>miR164<br>miR169<br>miR396<br>miR528 | miR159<br>miR167<br>miR395 |               |
|               |                                                                       |          |          |                 |                     | GRMZM2G435219 | GRMZM2G125777 |                                                |                            |               |
|               |                                                                       |          |          |                 |                     | GRMZM2G114850 | GRMZM2G009892 |                                                |                            |               |
|               |                                                                       |          |          |                 |                     | AC212570.3    | AC197246.3    |                                                |                            | GRMZM2G073750 |
|               |                                                                       |          |          |                 |                     | GRMZM2G048993 | GRMZM2G174807 |                                                |                            |               |
|               |                                                                       |          |          |                 |                     | GRMZM2G099862 | GRMZM2G067743 |                                                |                            |               |
|               |                                                                       |          |          |                 |                     | GRMZM2G018414 | GRMZM2G377589 |                                                |                            |               |
|               |                                                                       |          |          |                 |                     | GRMZM2G043453 | GRMZM2G034876 |                                                |                            |               |
|               |                                                                       |          |          |                 |                     | AC233751.1    | GRMZM2G028980 |                                                |                            |               |
|               |                                                                       |          |          |                 |                     | GRMZM2G139700 | GRMZM2G088842 |                                                |                            |               |
|               |                                                                       |          |          |                 |                     | GRMZM2G104262 | GRMZM2G334165 |                                                |                            |               |
|               |                                                                       |          |          |                 |                     | GRMZM2G393433 | GRMZM2G087095 |                                                |                            |               |
|               |                                                                       |          |          |                 |                     | GRMZM2G385641 | GRMZM2G125243 |                                                |                            |               |
|               |                                                                       |          |          |                 |                     | GRMZM2G475882 | GRMZM2G124566 |                                                |                            |               |
|               |                                                                       |          |          |                 |                     | GRMZM2G146688 | GRMZM2G164909 |                                                |                            |               |
|               |                                                                       |          |          |                 |                     | GRMZM2G017414 | AC233899.1    |                                                |                            |               |
|               |                                                                       |          |          |                 |                     | GRMZM2G435255 | GRMZM2G098594 |                                                |                            |               |
|               |                                                                       |          |          |                 |                     | AC210013.4    | GRMZM2G097258 |                                                |                            |               |
|               |                                                                       |          |          |                 |                     | GRMZM2G098696 | AC233853.1    |                                                |                            |               |
|               |                                                                       |          |          |                 |                     | GRMZM2G086869 | GRMZM2G378580 |                                                |                            |               |
|               |                                                                       |          |          |                 |                     | GRMZM2G146380 | GRMZM2G089640 |                                                |                            |               |
|               |                                                                       |          |          |                 |                     | GRMZM2G004619 | GRMZM2G129147 |                                                |                            |               |
|               |                                                                       |          |          |                 |                     | GRMZM2G035405 | GRMZM2G071589 |                                                |                            |               |
|               |                                                                       |          |          |                 |                     | GRMZM2G031001 | AY530952.1    |                                                |                            |               |
|               |                                                                       |          |          |                 |                     | GRMZM2G112598 | GRMZM2G041223 |                                                |                            |               |
|               |                                                                       |          |          |                 |                     | GRMZM2G079727 | GRMZM2G178261 |                                                |                            |               |
|               |                                                                       |          |          |                 |                     | GRMZM2G041352 | GRMZM2G078274 |                                                |                            |               |
|               |                                                                       |          |          |                 |                     | GRMZM2G478709 | GRMZM2G001139 |                                                |                            |               |
|               |                                                                       |          |          |                 |                     | GRMZM2G105335 | AC210792.5    |                                                |                            |               |
|               |                                                                       |          |          |                 |                     | GRMZM2G063522 | GRMZM2G435219 |                                                |                            |               |
|               |                                                                       |          |          |                 |                     | GRMZM2G125777 | GRMZM2G009892 |                                                |                            |               |
|               |                                                                       |          |          |                 |                     | GRMZM2G114850 | AC197246.3    |                                                |                            |               |
|               |                                                                       |          |          |                 |                     | GRMZM2G073750 | GRMZM2G048993 |                                                |                            |               |
| GRMZM2G067743 | GRMZM2G099862                                                         |          |          |                 |                     |               |               |                                                |                            |               |
| GRMZM2G018414 | GRMZM2G034876                                                         |          |          |                 |                     |               |               |                                                |                            |               |
| GRMZM2G028980 | GRMZM2G139700                                                         |          |          |                 |                     |               |               |                                                |                            |               |
| GRMZM2G088842 | GRMZM2G390470                                                         |          |          |                 |                     |               |               |                                                |                            |               |
| GRMZM2G334165 | GRMZM2G393433                                                         |          |          |                 |                     |               |               |                                                |                            |               |
| GRMZM2G087095 | GRMZM2G385641                                                         |          |          |                 |                     |               |               |                                                |                            |               |
| GRMZM2G125243 | GRMZM2G475882                                                         |          |          |                 |                     |               |               |                                                |                            |               |
| GRMZM2G124566 | GRMZM2G014193                                                         |          |          |                 |                     |               |               |                                                |                            |               |
| GRMZM2G164909 | GRMZM2G146688                                                         |          |          |                 |                     |               |               |                                                |                            |               |
| GRMZM2G017414 | AC233899.1                                                            |          |          |                 |                     |               |               |                                                |                            |               |
| GRMZM2G435255 | GRMZM2G098594                                                         |          |          |                 |                     |               |               |                                                |                            |               |
| AC210013.4    | AC233853.1                                                            |          |          |                 |                     |               |               |                                                |                            |               |
| GRMZM2G378580 | GRMZM2G089640                                                         |          |          |                 |                     |               |               |                                                |                            |               |
| GRMZM2G129147 | GRMZM2G146380                                                         |          |          |                 |                     |               |               |                                                |                            |               |
| GRMZM2G004619 | GRMZM2G035405                                                         |          |          |                 |                     |               |               |                                                |                            |               |
| AY530952.1    | GRMZM2G041223                                                         |          |          |                 |                     |               |               |                                                |                            |               |

9059

macromolecule biosynthetic process

5.99E-03

3.21E-02

49/174  
28.1%

3376/16863  
20.0%

miR156  
miR164  
miR169  
miR396  
miR528

miR159  
miR167  
miR395



|               |                                                                       |                                              |          |                |                     |                     | GRMZM2G017414 | AC233899.1                 |                            |                  |  |
|---------------|-----------------------------------------------------------------------|----------------------------------------------|----------|----------------|---------------------|---------------------|---------------|----------------------------|----------------------------|------------------|--|
|               |                                                                       |                                              |          |                |                     |                     | GRMZM2G435255 | GRMZM2G098594              |                            |                  |  |
|               |                                                                       |                                              |          |                |                     |                     | AC210013.4    | AC233853.1                 | GRMZM2G098696              |                  |  |
|               |                                                                       |                                              |          |                |                     |                     | GRMZM2G378580 | GRMZM2G089640              |                            |                  |  |
|               |                                                                       |                                              |          |                |                     |                     | GRMZM2G129147 | GRMZM2G146380              |                            |                  |  |
|               |                                                                       |                                              |          |                |                     |                     | GRMZM2G004619 | GRMZM2G035405              |                            |                  |  |
|               |                                                                       |                                              |          |                |                     |                     | AY530952.1    | GRMZM2G041223              |                            |                  |  |
|               |                                                                       |                                              |          |                |                     |                     | GRMZM2G031001 | GRMZM2G178261              |                            |                  |  |
|               |                                                                       |                                              |          |                |                     |                     | GRMZM2G079727 | GRMZM2G078274              |                            |                  |  |
|               |                                                                       |                                              |          |                |                     |                     | GRMZM2G001139 | GRMZM2G164020              |                            |                  |  |
|               |                                                                       |                                              |          |                |                     |                     | AC210792.5    | GRMZM2G105335              |                            |                  |  |
| zm_UR         | 6807                                                                  | nitrogen compound metabolic process          | 2.57E-03 | 1.95E-02       | 21/50<br>42.0%      | 3932/16863<br>23.3% | AC207656.3    | GRMZM2G178102              | miR160<br>miR172<br>miR529 | miR166<br>miR399 |  |
|               |                                                                       |                                              |          |                |                     |                     | GRMZM2G409974 | GRMZM2G085751              |                            |                  |  |
|               |                                                                       |                                              |          |                |                     |                     | GRMZM2G035520 | GRMZM2G010357              |                            |                  |  |
|               |                                                                       |                                              |          |                |                     |                     | AC225147.4    | GRMZM2G081406              |                            |                  |  |
|               |                                                                       |                                              |          |                |                     |                     | GRMZM2G369356 | GRMZM2G390641              |                            |                  |  |
|               |                                                                       |                                              |          |                |                     |                     | AC215260.3    | GRMZM2G005284              |                            |                  |  |
|               | GRMZM2G104325                                                         | GRMZM2G109987                                |          |                |                     |                     |               |                            |                            |                  |  |
|               | AC187157.4                                                            | GRMZM2G126239                                |          |                |                     |                     |               |                            |                            |                  |  |
|               | GRMZM2G017414                                                         | AC203369.3                                   |          |                |                     |                     |               |                            |                            |                  |  |
|               | GRMZM2G144821                                                         | GRMZM2G176175                                |          |                |                     |                     |               |                            |                            |                  |  |
|               | GRMZM2G076602                                                         |                                              |          |                |                     |                     |               |                            |                            |                  |  |
|               | 34641                                                                 | cellular nitrogen compound metabolic process | 2.57E-03 | 1.95E-02       | 21/50<br>42.0%      | 3932/16863<br>23.3% | AC207656.3    | GRMZM2G178102              | miR160<br>miR172<br>miR529 | miR166<br>miR399 |  |
| GRMZM2G409974 |                                                                       |                                              |          |                |                     |                     | GRMZM2G085751 |                            |                            |                  |  |
| GRMZM2G035520 |                                                                       |                                              |          |                |                     |                     | GRMZM2G010357 |                            |                            |                  |  |
| AC225147.4    |                                                                       |                                              |          |                |                     |                     | GRMZM2G081406 |                            |                            |                  |  |
| GRMZM2G369356 |                                                                       |                                              |          |                |                     |                     | GRMZM2G390641 |                            |                            |                  |  |
| AC215260.3    |                                                                       |                                              |          |                |                     |                     | GRMZM2G005284 |                            |                            |                  |  |
| GRMZM2G104325 | GRMZM2G109987                                                         |                                              |          |                |                     |                     |               |                            |                            |                  |  |
| AC187157.4    | GRMZM2G126239                                                         |                                              |          |                |                     |                     |               |                            |                            |                  |  |
| GRMZM2G017414 | AC203369.3                                                            |                                              |          |                |                     |                     |               |                            |                            |                  |  |
| GRMZM2G144821 | GRMZM2G176175                                                         |                                              |          |                |                     |                     |               |                            |                            |                  |  |
| GRMZM2G076602 |                                                                       |                                              |          |                |                     |                     |               |                            |                            |                  |  |
| 6139          | nucleobase, nucleoside, nucleotide and nucleic acid metabolic process | 2.57E-03                                     | 1.95E-02 | 21/50<br>42.0% | 3932/16863<br>23.3% | AC207656.3          | GRMZM2G178102 | miR160<br>miR172<br>miR529 | miR166<br>miR399           |                  |  |
|               |                                                                       |                                              |          |                |                     | GRMZM2G409974       | GRMZM2G085751 |                            |                            |                  |  |
|               |                                                                       |                                              |          |                |                     | GRMZM2G035520       | GRMZM2G010357 |                            |                            |                  |  |
|               |                                                                       |                                              |          |                |                     | AC225147.4          | GRMZM2G081406 |                            |                            |                  |  |
|               |                                                                       |                                              |          |                |                     | GRMZM2G369356       | GRMZM2G390641 |                            |                            |                  |  |
|               |                                                                       |                                              |          |                |                     | AC215260.3          | GRMZM2G005284 |                            |                            |                  |  |
| GRMZM2G104325 | GRMZM2G109987                                                         |                                              |          |                |                     |                     |               |                            |                            |                  |  |
| AC187157.4    | GRMZM2G126239                                                         |                                              |          |                |                     |                     |               |                            |                            |                  |  |
| GRMZM2G017414 | AC203369.3                                                            |                                              |          |                |                     |                     |               |                            |                            |                  |  |
| GRMZM2G144821 | GRMZM2G176175                                                         |                                              |          |                |                     |                     |               |                            |                            |                  |  |
| GRMZM2G076602 |                                                                       |                                              |          |                |                     |                     |               |                            |                            |                  |  |
| 90304         | nucleic acid metabolic process                                        | 4.57E-03                                     | 2.90E-02 | 17/50<br>34.0% | 3013/16863<br>17.8% | AC207656.3          | GRMZM2G178102 | miR160<br>miR172<br>miR529 | miR166<br>miR399           |                  |  |
|               |                                                                       |                                              |          |                |                     | GRMZM2G409974       | GRMZM2G085751 |                            |                            |                  |  |
|               |                                                                       |                                              |          |                |                     | GRMZM2G010357       | AC225147.4    |                            |                            |                  |  |
|               |                                                                       |                                              |          |                |                     | GRMZM2G081406       | GRMZM2G369356 |                            |                            |                  |  |

|  |  |  |  |  |  |  |  |               |               |  |  |
|--|--|--|--|--|--|--|--|---------------|---------------|--|--|
|  |  |  |  |  |  |  |  | GRMZM2G390641 | GRMZM2G005284 |  |  |
|  |  |  |  |  |  |  |  | GRMZM2G109987 | AC187157.4    |  |  |
|  |  |  |  |  |  |  |  | GRMZM2G126239 | AC203369.3    |  |  |
|  |  |  |  |  |  |  |  | GRMZM2G017414 | GRMZM2G176175 |  |  |
|  |  |  |  |  |  |  |  | GRMZM2G076602 |               |  |  |

DEVELOPMENT

| Gene ID     | Gene Name                                    | Category                       | Value 1  | Value 2         | Value 3           | Value 4           | Value 5     | Value 6     | Value 7     | Value 8     | Value 9 | Value 10 | Value 11 | Value 12 |
|-------------|----------------------------------------------|--------------------------------|----------|-----------------|-------------------|-------------------|-------------|-------------|-------------|-------------|---------|----------|----------|----------|
| sbi_UR      | 48830                                        | adventitious development, root | 1.65E-11 | 9.66E-09        | 9/212<br>4.2%     | 29/19262          | 0.1%        | SB01G019130 | SB02G003530 | SB04G026610 | miR160  | miR166   |          |          |
|             |                                              |                                |          |                 |                   |                   |             | SB04G038420 | SB10G027790 | SB02G003520 | miR168  | miR172   |          |          |
|             |                                              |                                |          |                 |                   |                   |             | SB10G031030 | SB06G033970 | SB06G025560 | miR395  |          |          |          |
|             | 48507                                        | meristem development,          | 1.70E-11 | 9.66E-09        | 17/212<br>8.0%    | 181/19262<br>0.9% |             | SB04G023990 | SB08G021460 | SB01G047250 |         |          |          |          |
|             |                                              |                                |          |                 |                   |                   |             | SB01G019000 | SB03G002660 | SB01G003400 | miR160  | miR164   |          |          |
|             |                                              |                                |          |                 |                   |                   |             | SB02G007000 | SB01G013710 | SB08G006330 | miR166  | miR172   |          |          |
|             |                                              |                                |          |                 |                   |                   |             | SB01G019120 | SB04G001190 | SB01G050000 | miR394  | miR395   |          |          |
|             |                                              |                                |          |                 |                   |                   |             | SB08G021350 | SB06G019010 | SB10G025053 | miR529  |          |          |          |
|             |                                              |                                |          |                 |                   |                   |             | SB10G027220 | SB06G022930 |             |         |          |          |          |
|             |                                              |                                |          |                 |                   |                   |             | SB03G029790 | SB08G005050 | SB02G025575 |         |          |          |          |
| SB04G026610 |                                              |                                |          |                 |                   |                   |             | SB04G038420 | SB08G021460 |             |         |          |          |          |
| SB08G023040 |                                              |                                |          |                 |                   |                   |             | SB08G002250 | SB01G003400 | miR159      | miR160  |          |          |          |
| SB02G007000 |                                              |                                |          |                 |                   |                   |             | SB01G011010 | SB01G019130 | miR164      | miR166  |          |          |          |
| 10154       | fruit development,                           | 5.04E-11                       | 1.90E-08 | 33/212<br>15.5% | 797/19262<br>4.1% |                   | SB02G043080 | SB08G021350 | SB10G025053 | miR168      | miR172  |          |          |          |
|             |                                              |                                |          |                 |                   |                   | SB10G027220 | SB01G021280 | SB06G022810 | miR390      | miR395  |          |          |          |
|             |                                              |                                |          |                 |                   |                   | SB04G023990 | SB10G027790 | SB01G001240 | miR397      | miR528  |          |          |          |
|             |                                              |                                |          |                 |                   |                   | SB02G025680 | SB01G017690 | SB03G002660 | miR529      |         |          |          |          |
|             |                                              |                                |          |                 |                   |                   | SB08G007250 | SB02G000900 | SB01G013710 |             |         |          |          |          |
|             |                                              |                                |          |                 |                   |                   | SB08G006330 | SB01G019120 | SB06G019010 |             |         |          |          |          |
|             |                                              |                                |          |                 |                   |                   | SB10G031030 | SB01G043290 | SB06G025560 |             |         |          |          |          |
|             |                                              |                                |          |                 |                   |                   | SB04G023990 | SB01G013710 | SB08G006330 | miR164      | miR166  |          |          |          |
|             |                                              |                                |          |                 |                   |                   | SB01G019120 | SB01G050000 | SB06G019010 | miR172      |         |          |          |          |
|             |                                              |                                |          |                 |                   |                   | SB08G021350 | SB03G002660 |             |             |         |          |          |          |
| 48316       | seed development,                            | 6.43E-09                       | 1.46E-06 | 29/212<br>13.6% | 766/19262<br>3.9% |                   | SB03G029790 | SB08G005050 | SB02G025575 |             |         |          |          |          |
|             |                                              |                                |          |                 |                   |                   | SB04G038420 | SB08G021460 | SB08G023040 |             |         |          |          |          |
|             |                                              |                                |          |                 |                   |                   | SB08G002250 | SB01G003400 | SB02G007000 | miR159      | miR160  |          |          |          |
|             |                                              |                                |          |                 |                   |                   | SB01G011010 | SB02G043080 | SB08G021350 | miR164      | miR166  |          |          |          |
|             |                                              |                                |          |                 |                   |                   | SB10G025053 | SB10G027220 | SB01G021280 | miR168      | miR172  |          |          |          |
|             |                                              |                                |          |                 |                   |                   | SB04G023990 | SB01G001240 | SB02G025680 | miR390      | miR395  |          |          |          |
|             |                                              |                                |          |                 |                   |                   | SB01G017690 | SB03G002660 | SB08G007250 | miR397      | miR528  |          |          |          |
|             |                                              |                                |          |                 |                   |                   | SB02G000900 | SB01G013710 | SB08G006330 | miR529      |         |          |          |          |
|             |                                              |                                |          |                 |                   |                   | SB01G019120 | SB06G019010 | SB10G031030 |             |         |          |          |          |
|             |                                              |                                |          |                 |                   |                   | SB01G043290 | SB06G025560 |             |             |         |          |          |          |
| 10072       | primary shoot apical meristem specification, | 9.76E-09                       | 1.84E-06 | 7/212<br>3.3%   | 26/19262          | 0.1%              | SB04G023990 | SB01G013710 | SB08G006330 | miR164      | miR166  |          |          |          |
|             |                                              |                                |          |                 |                   |                   | SB01G019120 | SB06G019010 | SB08G021350 | miR172      |         |          |          |          |
|             |                                              |                                |          |                 |                   |                   | SB03G002660 |             |             |             |         |          |          |          |
| 9855        | determination of bilateral symmetry,         | 3.71E-08                       | 6.01E-06 | 5/212<br>2.3%   | 10/19262          | 0.0%              | SB01G013710 | SB01G019120 | SB01G050000 | miR166      | miR172  |          |          |          |
|             |                                              |                                |          |                 |                   |                   | SB08G021350 | SB03G002660 |             |             |         |          |          |          |

|       |                                                |          |          |                 |                    |                                                                                                                                                    |                                                                                                                                                    |                                                                                                                                                    |                                                          |                                                          |
|-------|------------------------------------------------|----------|----------|-----------------|--------------------|----------------------------------------------------------------------------------------------------------------------------------------------------|----------------------------------------------------------------------------------------------------------------------------------------------------|----------------------------------------------------------------------------------------------------------------------------------------------------|----------------------------------------------------------|----------------------------------------------------------|
| 48508 | embryonic meristem development,                | 5.94E-08 | 8.41E-06 | 7/212<br>3.3%   | 33/19262<br>0.1%   | SB04G023990<br>SB01G019120<br>SB03G002660                                                                                                          | SB01G013710<br>SB06G019010                                                                                                                         | SB08G006330<br>SB08G021350                                                                                                                         | miR164<br>miR172                                         | miR166                                                   |
| 9793  | embryonic development ending in seed dormancy, | 1.36E-07 | 1.72E-05 | 25/212<br>11.7% | 680/19262<br>3.5%  | SB03G029790<br>SB04G038420<br>SB08G002250<br>SB08G021350<br>SB04G023990<br>SB03G002660<br>SB01G013710<br>SB06G019010<br>SB06G025560                | SB08G005050<br>SB08G021460<br>SB01G011010<br>SB10G027220<br>SB02G025680<br>SB08G007250<br>SB08G006330<br>SB10G031030<br>SB01G043290                | SB02G025575<br>SB08G023040<br>SB02G043080<br>SB01G021280<br>SB01G017690<br>SB02G000900<br>SB01G019120<br>SB01G043290                               | miR159<br>miR164<br>miR168<br>miR390<br>miR397<br>miR529 | miR160<br>miR166<br>miR172<br>miR395<br>miR528           |
| 7389  | pattern specification process,                 | 1.58E-07 | 1.78E-05 | 18/212<br>8.4%  | 370/19262<br>1.9%  | SB10G027913<br>SB04G026610<br>SB03G002660<br>SB01G013710<br>SB01G019120<br>SB06G019010                                                             | SB06G022810<br>SB10G027790<br>SB01G003400<br>SB01G019130<br>SB01G050000<br>SB10G025053                                                             | SB04G023990<br>SB08G021460<br>SB02G007000<br>SB08G006330<br>SB08G021350<br>SB10G027220                                                             | miR160<br>miR166<br>miR395                               | miR164<br>miR172<br>miR529                               |
| 48442 | sepal development,                             | 1.72E-06 | 9.27E-05 | 4/212<br>1.8%   | 9/19262<br>0.0%    | SB06G022810<br>SB10G027790                                                                                                                         | SB01G019130                                                                                                                                        | SB04G026610                                                                                                                                        | miR160<br>miR172                                         | miR166                                                   |
| 48464 | flower development, calyx                      | 1.72E-06 | 9.27E-05 | 4/212<br>1.8%   | 9/19262<br>0.0%    | SB06G022810<br>SB10G027790                                                                                                                         | SB01G019130                                                                                                                                        | SB04G026610                                                                                                                                        | miR160<br>miR172                                         | miR166                                                   |
| 9933  | meristem structural organization,              | 1.87E-06 | 9.27E-05 | 8/212<br>3.7%   | 76/19262<br>0.3%   | SB04G023990<br>SB01G019120<br>SB08G021350                                                                                                          | SB01G013710<br>SB01G050000<br>SB03G002660                                                                                                          | SB08G006330<br>SB06G019010                                                                                                                         | miR164<br>miR172                                         | miR166                                                   |
| 3002  | regionalization,                               | 1.88E-06 | 9.27E-05 | 15/212<br>7.0%  | 310/19262<br>1.6%  | SB10G027913<br>SB08G021460<br>SB02G007000<br>SB01G019120<br>SB06G019010                                                                            | SB06G022810<br>SB03G002660<br>SB01G013710<br>SB01G050000<br>SB10G025053                                                                            | SB04G023990<br>SB01G003400<br>SB08G006330<br>SB08G021350<br>SB10G027220                                                                            | miR160<br>miR166<br>miR395                               | miR164<br>miR172<br>miR529                               |
| 10073 | meristem maintenance,                          | 2.07E-06 | 9.77E-05 | 8/212<br>3.7%   | 77/19262<br>0.3%   | SB02G007000<br>SB10G025053<br>SB03G002660                                                                                                          | SB01G013710<br>SB08G021350<br>SB01G003400                                                                                                          | SB04G001190<br>SB01G047250                                                                                                                         | miR164<br>miR172<br>miR395                               | miR166<br>miR394<br>miR529                               |
| 48608 | reproductive structure development,            | 3.25E-07 | 3.07E-05 | 36/212<br>16.9% | 1312/19262<br>6.8% | SB03G029790<br>SB04G026610<br>SB08G023040<br>SB02G007000<br>SB02G043080<br>SB10G027220<br>SB06G022810<br>SB01G001240<br>SB03G000530<br>SB08G007250 | SB08G005050<br>SB04G038420<br>SB08G002250<br>SB01G011010<br>SB08G021350<br>SB01G021280<br>SB04G023990<br>SB01G047250<br>SB01G017690<br>SB02G000900 | SB02G025575<br>SB08G021460<br>SB01G003400<br>SB01G019130<br>SB10G025053<br>SB06G033970<br>SB10G027790<br>SB02G025680<br>SB03G002660<br>SB01G013710 | miR159<br>miR164<br>miR168<br>miR390<br>miR395<br>miR528 | miR160<br>miR166<br>miR172<br>miR394<br>miR397<br>miR529 |

SB08G006330 SB01G019120 SB06G019010  
 SB10G031030 SB01G043290 SB06G025560

|              |                           |          |          |                 |                   |                                                                                                       |                                                                                                       |                                                                                        |                                      |                            |
|--------------|---------------------------|----------|----------|-----------------|-------------------|-------------------------------------------------------------------------------------------------------|-------------------------------------------------------------------------------------------------------|----------------------------------------------------------------------------------------|--------------------------------------|----------------------------|
| 48829        | root cap development,     | 4.87E-07 | 4.24E-05 | 4/212<br>1.8%   | 7/19262 0.0%      | SB06G022810<br>SB10G027790                                                                            | SB01G019130                                                                                           | SB04G026610                                                                            | miR160<br>miR172                     | miR166                     |
| 48367        | shoot development,        | 6.18E-07 | 4.67E-05 | 20/212<br>9.4%  | 495/19262<br>2.5% | SB06G022810<br>SB10G027790<br>SB01G019000<br>SB01G019130<br>SB08G021350<br>SB10G031030<br>SB10G000980 | SB04G023990<br>SB04G038420<br>SB03G002660<br>SB08G006330<br>SB06G019010<br>SB06G022930<br>SB02G020900 | SB04G026610<br>SB08G021460<br>SB01G013710<br>SB01G019120<br>SB10G027220<br>SB06G025560 | miR160<br>miR166<br>miR172<br>miR529 | miR164<br>miR168<br>miR394 |
| 22621        | shoot development, system | 7.23E-07 | 5.12E-05 | 20/212<br>9.4%  | 500/19262<br>2.5% | SB06G022810<br>SB10G027790<br>SB01G019000<br>SB01G019130<br>SB08G021350<br>SB10G031030<br>SB10G000980 | SB04G023990<br>SB04G038420<br>SB03G002660<br>SB08G006330<br>SB06G019010<br>SB06G022930<br>SB02G020900 | SB04G026610<br>SB08G021460<br>SB01G013710<br>SB01G019120<br>SB10G027220<br>SB06G025560 | miR160<br>miR166<br>miR172<br>miR529 | miR164<br>miR168<br>miR394 |
| 48367        | shoot development,        | 8.26E-07 | 3.00E-04 | 17/160<br>10.6% | 495/19262<br>2.5% | SB01G009330<br>SB02G022011<br>SB02G008860<br>SB04G004430<br>SB06G027465<br>SB04G031890                | SB04G028510<br>SB04G034800<br>SB02G031370<br>SB05G021480<br>SB04G030770<br>SB01G012170                | SB08G021460<br>SB01G049280<br>SB10G001350<br>SB08G021350<br>SB10G027220                | miR156<br>miR169<br>miR396           | miR167<br>miR171           |
| sbi_OR 48366 | leaf development,         | 8.88E-07 | 3.00E-04 | 14/160<br>8.7%  | 337/19262<br>1.7% | SB01G009330<br>SB04G034800<br>SB04G004430<br>SB06G027465<br>SB04G031890                               | SB04G028510<br>SB02G008860<br>SB05G021480<br>SB10G027220<br>SB01G012170                               | SB08G021460<br>SB10G001350<br>SB08G021350<br>SB04G030770                               | miR156<br>miR169<br>miR396           | miR167<br>miR171           |
| 22621        | shoot development, system | 9.48E-07 | 3.00E-04 | 17/160<br>10.6% | 500/19262<br>2.5% | SB01G009330<br>SB02G022011<br>SB02G008860<br>SB04G004430<br>SB06G027465<br>SB04G031890                | SB04G028510<br>SB04G034800<br>SB02G031370<br>SB05G021480<br>SB04G030770<br>SB01G012170                | SB08G021460<br>SB01G049280<br>SB10G001350<br>SB08G021350<br>SB10G027220                | miR156<br>miR169<br>miR396           | miR167<br>miR171           |

|       |                                                                 |          |          |                |                   |                                                                         |                                                                         |                                                                         |                            |                  |
|-------|-----------------------------------------------------------------|----------|----------|----------------|-------------------|-------------------------------------------------------------------------|-------------------------------------------------------------------------|-------------------------------------------------------------------------|----------------------------|------------------|
| 48827 | phyllome development,                                           | 3.21E-06 | 7.61E-04 | 14/160<br>8.7% | 376/19262<br>1.9% | SB01G009330<br>SB04G034800<br>SB04G004430<br>SB06G027465<br>SB04G031890 | SB04G028510<br>SB02G008860<br>SB05G021480<br>SB10G027220<br>SB01G012170 | SB08G021460<br>SB10G001350<br>SB08G021350<br>SB04G030770<br>SB06G032500 | miR156<br>miR169<br>miR396 | miR167<br>miR171 |
| 9942  | longitudinal specification, axis                                | 2.00E-05 | 3.80E-03 | 4/160<br>2.5%  | 20/19262 0.1%     | SB04G004430<br>SB10G027220                                              | SB08G021460                                                             | SB06G032500                                                             | miR167                     | miR169           |
| 7291  | sperm individualization, lateral root                           | 3.06E-05 | 4.83E-03 | 3/160<br>1.8%  | 8/19262 0.0%      | SB08G000480                                                             | SB05G007370                                                             | SB05G000450                                                             | miR156                     |                  |
| 10386 | primordium development, leaf vascular tissue pattern formation, | 1.17E-04 | 8.16E-03 | 3/160<br>1.8%  | 12/19262 0.0%     | SB04G004430                                                             | SB08G021460                                                             | SB10G027220                                                             | miR167                     | miR169           |
| 10305 | leaf vascular tissue pattern formation,                         | 1.38E-04 | 8.16E-03 | 4/160<br>2.5%  | 32/19262 0.1%     | SB04G004430<br>SB10G027220                                              | SB08G021460                                                             | SB06G032500                                                             | miR167                     | miR169           |
| 10051 | xylem and phloem pattern formation,                             | 1.68E-04 | 8.42E-03 | 6/160<br>3.7%  | 98/19262 0.5%     | SB04G028510<br>SB08G021460                                              | SB04G004430<br>SB06G032500                                              | SB08G021350<br>SB10G027220                                              | miR156<br>miR169           | miR167<br>miR171 |



**Supplemental Table 8. Sorghum miRNAs co-localizing with CACTA TEs.**

Sorghum repeat sequences were downloaded from MIPS (<http://mips.helmholtz-muenchen.de/plant/sorghum/>), and were mapped to sorghum pseudomolecules. The locations of miRNA genes and the repeats were compared. miRNA genes located inside repeat regions were listed here.

| MiRNA_name | Fam | MiRNA_chr     | MiRNA_loci | CACTA_name  | CACTA_chr     | CACTA_start | CACTA_end |
|------------|-----|---------------|------------|-------------|---------------|-------------|-----------|
| S125       | 168 | chromosome_6  | 14647882   | CACTA_9307  | chromosome_6  | 14647453    | 14653423  |
| S167       | 169 | chromosome_7  | 40450314   | CACTA_10954 | chromosome_7  | 40450210    | 40452050  |
| S13        | 172 | chromosome_1  | 45078364   | CACTA_0956  | chromosome_1  | 45073289    | 45079344  |
| S15        | 172 | chromosome_1  | 46214211   | CACTA_0987  | chromosome_1  | 46209351    | 46215759  |
| S16        | 172 | chromosome_1  | 46215203   | CACTA_0987  | chromosome_1  | 46209351    | 46215759  |
| S38        | 172 | chromosome_2  | 56429006   | CACTA_3908  | chromosome_2  | 56418355    | 56429472  |
| S63        | 172 | chromosome_3  | 52113844   | CACTA_5479  | chromosome_3  | 52112159    | 52114312  |
| S107       | 172 | chromosome_5  | 6929611    | CACTA_7559  | chromosome_5  | 6928165     | 6930077   |
| S110       | 172 | chromosome_5  | 9797325    | CACTA_7670  | chromosome_5  | 9792584     | 9798600   |
| S116       | 172 | chromosome_5  | 46749674   | CACTA_8392  | chromosome_5  | 46745458    | 46750140  |
| S121       | 172 | chromosome_5  | 60798258   | CACTA_8883  | chromosome_5  | 60792361    | 60798714  |
| S123       | 172 | chromosome_6  | 1477179    | CACTA_8989  | chromosome_6  | 1471096     | 1477644   |
| S156       | 172 | chromosome_7  | 3408080    | CACTA_10376 | chromosome_7  | 3403514     | 3408546   |
| S163       | 172 | chromosome_7  | 15073370   | CACTA_10673 | chromosome_7  | 15068307    | 15073836  |
| S170       | 172 | chromosome_7  | 53585560   | CACTA_11194 | chromosome_7  | 53581009    | 53586016  |
| S186       | 172 | chromosome_8  | 18212165   | CACTA_11907 | chromosome_8  | 18207150    | 18212631  |
| S195       | 172 | chromosome_8  | 44197738   | CACTA_12293 | chromosome_8  | 44192672    | 44198204  |
| S196       | 172 | chromosome_8  | 45986917   | CACTA_12333 | chromosome_8  | 45982009    | 45987383  |
| S210       | 172 | chromosome_9  | 16896660   | CACTA_13049 | chromosome_9  | 16891281    | 16899546  |
| S231       | 172 | chromosome_10 | 20795501   | CACTA_2111  | chromosome_10 | 20791855    | 20796292  |
| S234       | 172 | chromosome_10 | 25878314   | CACTA_2191  | chromosome_10 | 25869096    | 25878780  |
| S119       | 172 | chromosome_5  | 53444396   | CACTA_8666  | chromosome_5  | 53439630    | 53444862  |
| S191       | 172 | chromosome_8  | 38488898   | CACTA_12167 | chromosome_8  | 38483981    | 38489364  |

**Supplemental Table 9. Sorghum miRNAs co-localizing with retrotransposons.**

Sorghum repeat sequences were downloaded from MIPs (<http://mips.helmholtz-muenchen.de/plant/sorghum/>), and were mapped to sorghum pseudomolecules. The locations of miRNA genes and the repeats were compared. miRNA genes located inside repeat regions were listed here.

| MiRNA               | Fam | MiRNA_chr    | MiRNA_loci | Repeat_name             | TE_class | Repeat_chr   | Repeat_start | Repeat_end |
|---------------------|-----|--------------|------------|-------------------------|----------|--------------|--------------|------------|
| S182                | 156 | chromosome_8 | 3685194    | Zm1S_101L               | RLC      | chromosome_8 | 3678570      | 3722990    |
| S128                | 160 | chromosome_6 | 34672498   | LTR_Sb_chr_09_740       | RLG      | chromosome_6 | 34665696     | 34716252   |
| S128                | 160 | chromosome_6 | 34672498   | LTR_Sb_chr_04_8         | RLG      | chromosome_6 | 34670994     | 34674987   |
| S190                | 160 | chromosome_8 | 35825207   | LTR_Sb_chr_10_185       | RLG      | chromosome_8 | 35821807     | 35831038   |
| S193                | 164 | chromosome_8 | 43308656   | LTR_Sb_chr_05_919       | RLX      | chromosome_8 | 43308568     | 43312716   |
| S211                | 164 | chromosome_9 | 22254387   | LTR_Sb_chr_08_237       | RLX      | chromosome_9 | 22246193     | 22255377   |
| S12 <sup>a</sup>    | 166 | chromosome_1 | 27013469   | TSB1                    | DXX      | chromosome_1 | 26713547     | 27108523   |
| S177 <sup>a</sup>   | 169 | chromosome_7 | 61071183   | LTR_Sb_chr_07_952       | RLX      | chromosome_7 | 61031190     | 61082951   |
| S175 <sup>a,b</sup> | 169 | chromosome_7 | 61062642   | LTR_Sb_chr_07_952       | RLX      | chromosome_7 | 61031190     | 61082951   |
| S174 <sup>a,b</sup> | 169 | chromosome_7 | 61058645   | LTR_Sb_chr_07_952       | RLX      | chromosome_7 | 61031190     | 61082951   |
| S176 <sup>a,b</sup> | 169 | chromosome_7 | 61068030   | LTR_Sb_chr_07_952       | RLX      | chromosome_7 | 61031190     | 61082951   |
| S35                 | 171 | chromosome_2 | 47093982   | 167252                  | RLG      | chromosome_2 | 47090884     | 47101721   |
| S162 <sup>a,c</sup> | 171 | chromosome_7 | 7609192    | TSB1                    | DXX      | chromosome_7 | 7607068      | 7621136    |
| S189                | 171 | chromosome_8 | 28393889   | LTR_Sb_chr_05_355       | RLX      | chromosome_8 | 28315431     | 28439686   |
| S189                | 171 | chromosome_8 | 28393889   | LTR_Sb_chr_08_166       | RLG      | chromosome_8 | 28390716     | 28404257   |
| S67                 | 390 | chromosome_3 | 59556688   | LTR_Sb_chr_01_468       | RLG      | chromosome_3 | 59554775     | 59558261   |
| S56 <sup>a,c</sup>  | 393 | chromosome_3 | 6521860    | LTR_Sb_chr_04_821       | RLX      | chromosome_3 | 6454045      | 6524936    |
| S93                 | 395 | chromosome_4 | 55506096   | LTR_Sb1_00012_513_2frag | RLG      | chromosome_4 | 55503929     | 55506357   |
| S127                | 395 | chromosome_6 | 29530218   | sb_mite_stow1_6         | DXX      | chromosome_6 | 29521794     | 29544199   |
| S127                | 395 | chromosome_6 | 29530218   | LTR_Sb_chr_06_589       | RLX      | chromosome_6 | 29522161     | 29534206   |
| S34                 | 395 | chromosome_2 | 41031623   | LTR_Sb_chr_10_471       | RLX      | chromosome_2 | 41023490     | 41033785   |
| S34                 | 395 | chromosome_2 | 41031623   | 121128                  | RLX      | chromosome_2 | 41027231     | 41033785   |
| S14                 | 528 | chromosome_1 | 45464230   | LTR_Sb_chr_06_12        | RLX      | chromosome_1 | 45460744     | 45464814   |

|                    |     |               |          |                        |     |               |          |          |
|--------------------|-----|---------------|----------|------------------------|-----|---------------|----------|----------|
| S25 <sup>a</sup>   | 528 | chromosome_1  | 71476713 | LTR_Sb_chr_01_31_2frag | RLX | chromosome_1  | 71465645 | 71518660 |
| S45                | 529 | chromosome_2  | 62916250 | LTR_Sb_chr_01_85       | RLX | chromosome_2  | 62908764 | 62928982 |
| S84                | 529 | chromosome_4  | 26708986 | LTR_Sb_chr_07_793      | RLG | chromosome_4  | 26695016 | 26709484 |
| S124               | 529 | chromosome_6  | 12301200 | LTR_Sb_chr_05_493      | RLX | chromosome_6  | 12289973 | 12324395 |
| S124               | 529 | chromosome_6  | 12301200 | LTR_Sb_chr_01_113      | RLX | chromosome_6  | 12296375 | 12303476 |
| S126               | 529 | chromosome_6  | 25434422 | LTR_Sb_chr_07_80       | RLG | chromosome_6  | 25423769 | 25457149 |
| S126               | 529 | chromosome_6  | 25434422 | LTR_Sb_chr_07_537      | RLX | chromosome_6  | 25429593 | 25438852 |
| S136               | 529 | chromosome_6  | 52010926 | LTR_Sb_chr_02_1099     | RLX | chromosome_6  | 51985994 | 52073162 |
| S188               | 529 | chromosome_8  | 22744157 | LTR_Sb_chr_08_329      | RLG | chromosome_8  | 22735570 | 22747691 |
| S212               | 529 | chromosome_9  | 24058551 | LTR_Sb_chr_09_376      | RLX | chromosome_9  | 24048852 | 24063021 |
| S213               | 529 | chromosome_9  | 30854735 | LTR_Sb1_00023_988      | RLG | chromosome_9  | 30847233 | 30858284 |
| S37                | 156 | chromosome_2  | 54338257 | LTR_Sb_chr_05_838      | RLG | chromosome_2  | 54290809 | 54377919 |
| S85                | 156 | chromosome_4  | 34641453 | LTR_Sb_chr_03_716      | RLX | chromosome_4  | 34640647 | 34644014 |
| S233               | 156 | chromosome_10 | 23656923 | LTR_Sb_chr_10_348      | RLX | chromosome_10 | 23649530 | 23657456 |
| S32                | 156 | chromosome_2  | 20337063 | LTR_Sb_chr_02_222      | RLX | chromosome_2  | 20336259 | 20344091 |
| S169               | 156 | chromosome_7  | 50900223 | LTR_Sb_chr_07_399      | RLX | chromosome_7  | 50859526 | 50907384 |
| S69 <sup>a,c</sup> | 167 | chromosome_3  | 64088383 | LTR_Sb_chr_08_848      | RLX | chromosome_3  | 64079722 | 64162578 |
| S31                | 167 | chromosome_2  | 20219834 | LTR_Sb_chr_05_371      | RLX | chromosome_2  | 20218303 | 20220033 |
| S20                | 172 | chromosome_1  | 57701721 | TSB1                   | DXX | chromosome_1  | 57681712 | 57783446 |
| S237               | 172 | chromosome_10 | 46113277 | LTR_Sb1_00010_169      | RLX | chromosome_10 | 46109238 | 46113347 |
| S225 <sup>a</sup>  | 399 | chromosome_10 | 1544258  | LTR_Sb_chr_10_17       | RLX | chromosome_10 | 1538717  | 1603205  |

<sup>a</sup> miRNAs located in the grass syntenic region; <sup>b</sup> miRNAs are retained after WGDs;

<sup>c</sup> miRNAs have an ortholog associated with repeat elements

**Supplemental Table 10. Over-retained miRNA families with lower transposition frequency.**

Transposed miRNAs (each family with minimum two members) are listed according to the family (first column), number of transposition events identified (second column), expresses in total (third column), and percentage (fourth column).

| Family         | #Transposition | #Total | %      |
|----------------|----------------|--------|--------|
| Over-retained  |                |        |        |
| 156            | 6              | 32     | 18.75  |
| 167            | 2              | 12     | 16.67  |
| 169            | 5              | 25     | 20     |
| 171            | 4              | 12     | 33.33  |
| 399            | 1              | 11     | 9.09   |
| 396            | 0              | 4      | 0      |
| Average        | 3              | 16     | 16.31  |
| Under-retained |                |        |        |
| 160            | 3              | 5      | 60     |
| 164            | 2              | 6      | 33.33  |
| 166            | 1              | 5      | 20     |
| 172            | 23             | 32     | 71.88  |
| 319            | 0              | 3      | 0      |
| 395            | 5              | 17     | 29.41  |
| 528            | 2              | 3      | 66.67  |
| 529            | 10             | 15     | 66.67  |
| Average        | 5.75           | 10.75  | 43.495 |

**Supplemental Table 11. Preferential distribution of transposed miRNAs between duplicated ancient chromosome pairs.**

Transposed miRNAs are listed according to their location on the ancestral chromosome (first column), on the modern sorghum chromosomes (second column), and number of transposed miRNAs identified (third column).

| Ancestor chr | Sorghum_chr   | #miRNA_transposed |
|--------------|---------------|-------------------|
| A1           | chromosome_3  | 2                 |
| A5           | chromosome_9  | 4                 |
| A8           | chromosome_7  | 5                 |
| A9           | chromosome_2  | 8                 |
| A11          | chromosome_8  | 10                |
| A12          | chromosome_5  | 5                 |
| A2           | chromosome_4  | 3                 |
| A4           | chromosome_6  | 11                |
| A6           | chromosome_10 | 5                 |
| A3           | chromosome_1  | 1                 |
| A7           | chromosome_2  | 0                 |
| A10          | chromosome_1  | 4                 |
